1 ORIGINAL ARTICLE

2  
3  
4  
5  
6  
7  
8  
9  
10  
11  
12  
13  
14  
15  
16  
17  
18  
19

**Phylogenomics, biogeography, and evolution in the American palm genus *Brahea***

Craig F. Barrett<sup>1,\*</sup>, Brandon T. Sinn<sup>1</sup>, Loren T. King<sup>1</sup>, Jesus C. Medina<sup>2</sup>, Christine D. Bacon<sup>3,4</sup>, Sean C. Lahmeyer<sup>5</sup>, and Donald R. Hodel<sup>6</sup>

<sup>1</sup>Department of Biology, West Virginia University, 53 Campus Dr., Morgantown, West Virginia, USA 26506

<sup>2</sup>Department of Biological Sciences, California State University, 5151 State University Dr., Los Angeles, Los Angeles, California, USA 90032

<sup>3</sup>Department of Biological and Environmental Sciences, University of Gothenburg, Carl Skottsbergs gata 22B, P.O. Box 461, SE 405 30, Göteborg, Sweden

<sup>4</sup>Gothenburg Global Biodiversity Centre, Box 461, SE-405 30, Göteborg, Sweden

<sup>5</sup>The Huntington Library, Art Collections, and Botanical Gardens, 1151 Oxford Road, San Marino, California, USA 91108

<sup>6</sup>University of California Cooperative Extension, 700 West Main Street, Alhambra, California USA 91801

\*Corresponding author. Email: [cfb0001@mail.wvu.edu](mailto:cfb0001@mail.wvu.edu), phone: 1 (304) 293-7506

20 ABSTRACT

- 21 • **Background and Aims:** Slow rates of molecular evolution at low taxonomic levels  
22 hamper studies of relationships among species, and subsequent biogeographic and  
23 evolutionary analyses. An example is the genus *Brahea*, which is among the most poorly  
24 understood lineages of American palms and is characterized by a wide variety of growth  
25 forms and intermediate morphological features.
- 26 • **Methods:** We generated approximately 400 kb of genome-scale data from all three  
27 genomes for the 11 currently described species of *Brahea* to infer phylogenetic  
28 relationships, reconstruct ancestral growth form, estimate ancestral geographic ranges,  
29 and test for niche equivalency among closely related species with geographic overlap.
- 30 • **Key Results:** Relationships receive strong support, and conform to previous subgeneric  
31 assignments, except for placement of the dwarf species *B. moorei* within subgenus  
32 *Erythea*. Our robust phylogenetic hypothesis reveals trends in growth form including an  
33 overall increase in height in the *B. armata* clade, and independent evolution of dwarf  
34 forms from taller ancestors in the *B. pimo* and *B. dulcis* clades. Ancestral range  
35 estimation reveals roles of dispersal (e.g. *B. edulis* on Guadalupe Island) and sympatric  
36 speciation in some cases (e.g. in the *B. armata* clade), but is equivocal in others (e.g. in  
37 the *B. pimo* clade). We find evidence of niche non-equivalency among species within the  
38 *B. armata* clade in northwestern Mexico, and some evidence of niche non-equivalency  
39 between *B. berlandieri* and *B. dulcis*, the former of which is synonymized under *B.*  
40 *dulcis*.
- 41 • **Conclusions:** Our findings have implications for the complex biogeographic history in  
42 Central America and Mexico, suggesting that sympatric speciation and dispersal are the  
43 predominant processes of species diversification. Future studies should include  
44 population-level sampling across the genus, along with morphological and ecological  
45 information, to assess distinctness among species and, particularly, levels of gene flow, in  
46 an integrative fashion.

47

48

KEY WORDS

49 Central America, diversification, growth forms, Mexico, niche, phylogeny, Arecaceae

50

## INTRODUCTION

51  
52  
53  
54  
55  
56  
57  
58  
59  
60  
61  
62  
63  
64  
65  
66  
67  
68  
69  
70  
71  
72  
73  
74  
75  
76  
77  
78  
79  
80  
81  
82  
83  
84  
85  
86  
87  
88  
89  
90

The palms (family Arecaceae) are globally emblematic components of tropical and subtropical ecosystems (Uhl and Dransfield, 1987; Dransfield, Uhl, *et al.*, 2008; Asmussen *et al.*, 2006; Baker *et al.*, 2009; Baker and Dransfield, 2016; Balslev *et al.*, 2016). Palms are notorious for having slow substitution rates among the monocot angiosperms, likely resulting from their large size and associated consequences for the inheritance of new mutations (Gaut *et al.*, 1992; Lanfear *et al.*, 2013; Barrett *et al.*, 2016a). Slow mutation rates equate to fewer informative molecular characters for phylogenetic analysis, and thus hamper our understanding of interspecific relationships in many clades. Resolved, strongly supported phylogenetic hypotheses form an essential basis for taxonomic research and subsequent inference of character evolution, biogeography, and niche evolution. Genome-scale datasets provide a solution, having become feasible to obtain with the widespread availability of high-throughput sequencing methods. Not surprisingly, palm systematists have begun to embrace phylogenomic approaches (Comer *et al.*, 2015; Barrett *et al.*, 2016a; Comer *et al.*, 2016; Barrett *et al.*, 2016b; Heyduk *et al.*, 2016; Bacon *et al.* in review).

The fan palm genus *Brahea* Endl. *ex* Mart. exemplifies the situation described above, and is among the most taxonomically problematic and poorly understood clades of American palms (subfamily Coryphoideae, tribe Trachycarpeae, within which the placement of *Brahea* is uncertain; Quero and Yáñez, 2000; Quero, 2000; Hodel, 2006; Dransfield *et al.*, 2008; Bacon *et al.*, 2012; Barrett *et al.*, 2015; Baker and Dransfield, 2016). The genus comprises 11 currently recognized species (Hodel, 2006; Govaerts *et al.*, 2018), that grow in dry, often calcareous soils in the coastal and lower montane regions of Mexico and Central America extending to Nicaragua. *Brahea* sometimes occurs with *Sabal* and *Washingtonia*, two other fan palm genera. The costapalmate leaf blades (i.e. extension of petiole into the blade) distinguish *Sabal* from *Brahea*. *Washingtonia*, which occurs natively in Baja California and Sonora, Mexico and in isolated oases in California and Arizona (and perhaps Nevada?), USA, has a similar overall appearance to some *Brahea* species, but differs in its bright to dull green leaves, whereas co-occurring *Brahea* (*B. armata*, *B. brandegeei*) have blue-green or gray leaves. Florally *Brahea* has three carpels connate only in the styles while *Sabal* has three carpels connate throughout. *Brahea* has tubular inflorescence rachis bracts while those of *Washingtonia* split on one side, become pendulous and are sword shaped.

Endlicher (1837) first informally used the genus name *Brahea*, honoring the Danish astronomer Tycho Brahe, and Martius (1838) validly published it a year later. Watson (1880) subsequently described the genus *Erythea*, which contains some species currently recognized in *Brahea*. *Brahea* was originally distinguished as having unarmed petioles, relatively small fruits, and solitary flowers, whereas *Erythea* was distinguished by having armed petioles, larger fruits, and clustered flowers at the base of the inflorescence. Moore (1973) and Uhl and Dransfield (1987) recognized these genera as a single genus, *Brahea*, with two subgenera—*Brahea* and *Erythea*. More recently, Quero and Yáñez (2000), and subsequently Hodel (2006) have refined

91 various names associated with *Brahea* into 12 and 11 species, respectively, based on  
92 morphological and ecological observations. While other treatments recognize nine species (e.g.  
93 Henderson et al. 1995), here we follow Hodel (2006, see also Hodel 2018) and Govaerts et al.  
94 (2018) the most recent and comprehensive treatments of the genus.

95 Subgenus *Erythea*, as currently circumscribed, contains seven species. *Brahea aculeata*,  
96 *B. armata*, and *B. brandegeei* are found in the arid, desert scrub regions of northwestern Mexico  
97 and Baja California, and are distinguished by having distinctly armed petioles. *Brahea edulis* is  
98 endemic to Guadalupe Island, located approximately 240 km west of Baja California, and is  
99 IUCN red-listed as endangered in the wild (EN, C1; Johnson, 1998). This species is  
100 distinguished by unarmed petioles and large fruit size (> 25 mm in diameter). *Brahea pimo*  
101 occurs in the western pine-oak sierras of Mexico, and *B. salvadorensis* is restricted to El  
102 Salvador and Guatemala. These two species have distinctive hairy scales on the petioles and  
103 adaxial leaf surfaces and hairy-tomentose flowers, differing mainly in the degree of the latter.

104 Subgenus *Brahea* contains the widespread and highly variable *B. dulcis* and *B. calcarea*  
105 from Mexico into Guatemala, Honduras, and Nicaragua. The subgenus is distinguished mainly  
106 by absence or reduction of petiolar teeth. *Brahea dulcis* has small teeth at the base of the petiole,  
107 and inflorescences usually shorter than the leaves, whereas *B. calcarea* has unarmed petioles and  
108 inflorescences exceeding the length of the leaves. *Brahea berlandieri*, which is currently  
109 synonymized with *B. dulcis* (Govaerts and Dransfield, 2005; Hodel 2006; Govaerts et al., 2018;  
110 Hodel, 2018), occurs in northeastern Mexico, and was originally distinguished by having shorter  
111 rachillae than *B. dulcis* by Quero and Yáñez (2000). Though synonymized, it is unclear whether  
112 *B. berlandieri* is distinct from *B. dulcis* or whether it is a local form of the latter in northeastern  
113 Mexico. The two dwarf species *B. decumbens* (montane, limestone soils in open, rocky sites) and  
114 *B. moorei* (limestone soils in montane oak forest understory) differ in that *B. decumbens* has  
115 blue-gray leaves and a branching, creeping trunk, whereas *B. moorei* has leaves green adaxially  
116 and chalky white abaxially, is solitary, and appears trunkless. Quero (2000) subsequently  
117 described *Brahea sarukhanii* from a narrow region of Nayarit and Jalisco in central-western  
118 Mexico, but this species is of uncertain affinity in that it displays characteristics of both  
119 subgenera, including small teeth near the base of the petiole and relatively smaller fruits. Hodel  
120 (2006) distinguishes this species from the widespread and co-occurring *B. dulcis* by the  
121 persistence of old leaf bases along the entire length of the trunk as opposed to only along the  
122 upper third of the trunk (*B. dulcis*).

123 Despite recent taxonomic progress, there has been no explicit phylogenetic analysis of  
124 relationships in *Brahea*. Furthermore, the existence of morphological intermediacy,  
125 environmental and local variation, and hybridization/introgression (e.g. Ramirez-Rodríguez *et*  
126 *al.*, 2011) have likely precluded a definitive understanding of taxonomy in this genus. *Brahea*  
127 presents striking variation in growth form, with some species being trees of tall-to-medium  
128 stature at one extreme, some of variable or intermediate height (e.g. *B. pimo*, *B. aculeata*), and  
129 some having small, acaulescent, creeping, shrub-like, or caespitose growth forms (e.g. *B.*  
130 *decumbens*, *B. moorei*). The two dwarf species, *B. decumbens* and *B. moorei*, grow in sympatry

131 in northeastern Mexico, calling into question whether these species are closely related, or if they  
132 represent convergent growth forms within the genus. Thus *Brahea* represents a highly  
133 appropriate system in which to test the hypothesis that height and DNA substitution rates are  
134 negatively correlated (sensu Lanfear et al., 2013).

135 Species of *Brahea* occupy a wide variety of environmental conditions across the  
136 geographic range of the genus, from northern Mexico to Nicaragua, where they often represent  
137 major ecosystem structural components, especially in desert and other xeric habitats (Uhl &  
138 Dransfield, 1987; Henderson et al., 1995; Quero, 2000; Hodel, 2006; Dransfield, Uhl, et al.,  
139 2008; Wehncke et al., 2013). However, the biogeographic history of this clade is unknown, and  
140 likely complex, potentially having been shaped by vicariance, dispersal, and sympatric speciation  
141 across a geologically dynamic landscape (e.g. Sedlock et al., 1993). The geological history of  
142 Mexico is also complex, with several major events having occurred over the last few tens of  
143 millions of years that could have potentially shaped distributions and species divergence in  
144 *Brahea*. These include the formation of: (1) the Mexican Transvolcanic Belt ca. 15 million years  
145 ago (mya), bisecting mainland Mexico to the north and south; (2) the opening of the Gulf of  
146 California, separating Baja California from western mainland Mexico ca. 7.2 mya; and (3) the  
147 formation of Guadalupe Island via volcanic activity also around 7.2 mya (Ferrari et al., 2012;  
148 Bennett and Oskin, 2014; Dolby et al., 2015). It is currently unknown if or how these processes  
149 influenced diversification and dispersal in *Brahea*.

150 In addition to the potential allopatric influence of geological processes in diversification,  
151 several species of *Brahea* have contemporary, overlapping ranges, and may exemplify cases of  
152 sympatric niche differentiation and speciation. For example, *B. armata* overlaps with *B. aculeata*  
153 and *B. brandegeei* in northwestern Mexico, while *B. dulcis* overlaps with *B. calcarea*, *B. pimo*,  
154 *B. moorei*, *B. sarukhanii*, *B. decumbens*, and the synonymous “*B. berlandieri*” on mainland  
155 Mexico. Species distribution models (SDMs) allow us to test for ecological scenarios potentially  
156 underlying species diversification (Nunes and Pearson, 2017). We can test for phylogenetic niche  
157 diversification vs. conservatism (Harvey and Pagel, 1991; reviewed in Pyron et al., 2015) by  
158 assessing the equivalence of inferred niche space between species pairs relative to niche  
159 differences due to random chance. We expect to find closely-related species that occupy distinct  
160 niche spaces, often with overlapping ranges or in close proximity.

161 Here we use a combination of genome skimming (plastid and mitochondrial genomes,  
162 ribosomal DNA cistrons) and Sanger sequencing of single-copy nuclear introns to generate a  
163 phylogenomic dataset of approximately 400 kb. Our specific objectives are to: (1) provide  
164 resolution and support for species-level phylogenetic relationships within *Brahea* and to test the  
165 current subgeneric circumscription; (2) test the putative association between plant height and  
166 substitution rate in a phylogenetic context via ancestral state reconstruction; (3) infer divergence  
167 times and biogeographic history; and (4) test for niche differentiation among closely related,  
168 geographically overlapping species. This study has implications for Central American  
169 biogeography (more prominent roles for dispersal and sympatric speciation than for allopatric  
170 speciation via vicariance), patterns of ecologically driven species diversification (sympatric

171 niche differentiation), growth form evolution, horticulture, and conservation of these  
172 ecologically important palms.  
173  
174

175 MATERIALS AND METHODS

176

177 **Phylogenetic analyses**

178 **Taxon sampling and DNA sequencing.** We sampled all 11 species currently recognized  
179 in *Brahea* (Table 1, including *Washingtonia robusta* and *Chamaerops humilis* as outgroups;  
180 Hodel, 2006; Govaerts et al., 2018), extracted DNAs using the CTAB method (Doyle and Doyle,  
181 1987), and used standard procedures for Illumina library preparation and sequencing  
182 [Supplementary Information, Methods]. We amplified nuclear intron regions, corresponding to  
183 the Malate Synthase (*MS*) gene; Serine/Threonine Protein Kinase genes *CISP4* and *CISP5*; and  
184 DNA-directed RNA Polymerase Subunit Beta gene (*RPB2*) [Supplementary Information,  
185 Methods].

186 **DNA assembly, alignment and phylogenetic analyses.** We assembled plastid,  
187 mitochondrial, and rDNA contigs de novo in NOVOPlasty (version 2.6.3; Dierckxsens *et al.*,  
188 2016), and extended contigs in GENEIOUS v.11 (Biomatters Ltd., New Zealand). We aligned  
189 plastomes in MAFFT v.1.33 (Katoh and Standley, 2013), and MUSCLE (Edgar, 2004), and  
190 removed positions containing gaps. We subjected both separate and concatenated alignments to  
191 phylogenetic analysis under Parsimony, Maximum Likelihood, Bayesian, and quartet-based  
192 methods. We conducted: Parsimony searches in TNT with 2,000 jackknife replicates (Goloboff  
193 *et al.*, 2008); Maximum Likelihood (ML) searches in RAxML v.8 under a GTRGAMMA model  
194 with 1,000 standard bootstrap replicates (Stamatakis, 2014); Bayesian analyses in MrBayes  
195 v.3.2.6 (Ronquist *et al.*, 2012) for  $10^7$  generations (GTR+Gamma+I model) and with the first  
196 25% as burn-in; and quartet-based methods in SVDquartets using both concatenated and  
197 coalescent models, each with 1,000 bootstrap replicates (Chifman and Kubatko, 2014; 2015)  
198 [details of these analyses can be found in Supplementary Information, Methods]. We quantified  
199 congruence and conflict among ML topologies based on plastid, mitochondrial, nuclear rDNA,  
200 and nuclear introns using Robinson-Foulds (RF) tree distances (Robinson and Foulds, 1979) in  
201 PAUP v.4.0 (Swofford, 2002).

202

203 **Growth form evolution**

204 We reconstructed the evolution of growth form among species of *Brahea* by using  
205 maximum plant height following values in Henderson *et al.* (1995), Quero (2000), and Quero  
206 and Yáñez (2000). We used the R (R Core Development Team, 2014) packages ‘ape’ (Paradis,  
207 2004) and ‘phytools’ (Revell, 2012) to infer ancestral values for height under a Maximum  
208 Likelihood Brownian Motion model, based on the combined, total evidence tree with branch  
209 lengths converted to ultrametric via non-parametric rate smoothing (Sanderson, 1997) in R. We  
210 computed root-to-tip GTR distances using the ‘vcv.phylo’ function on the non-smoothed  
211 phylogram from above, and regressed these on maximum height values using standard and  
212 phylogenetic regression via Independent Contrasts (Felsenstein, 1980; Garland *et al.*, 1992) in  
213 the R package ‘ape’. We tested for phylogenetic signal in both maximum height and GTR-based  
214 branch lengths from the combined RAxML tree using Pagel’s  $\lambda$ .

215

## 216 **Biogeographic analyses**

217 **Divergence time estimation.** We estimated divergence times among species of *Brahea* in  
218 BEAST2 (Bouckaert *et al.*, 2014) under a Lognormal Relaxed Clock (Drummond *et al.*, 2006)  
219 and a GTR+Gamma+I substitution model with parameters estimated from the data. We added  
220 data from all *Brahea* species to the dataset of Couvreur *et al.* (2011), for a total of nine loci [see  
221 Supplementary Information, Methods for additional details]. We chose four calibration points  
222 with exponential priors, to be consistent with the analysis of Couvreur *et al.* (2011): *Sabalites*  
223 (Berry, 1914), to calibrate the stem node of Coryphoideae at [minimum age offset = 85.8 million  
224 years ago (mya), mean = 1.0]; *Mauritiidites* (Schrank, 1994) to calibrate Mauritiinae (minimum  
225 age offset = 65.0 mya, mean = 1.5); a *Cocos*-like fossil to calibrate subtribe Attaleinae  
226 (minimum age offset = 54.8 mya, mean = 2.0); and *Hyphaenae kapelmanii* (Pan *et al.*, 2006) to  
227 calibrate the stem node of Hyphaeninae (minimum age offset = 27.0 mya, mean = 0.5). We also  
228 constrained the stem node of palms (i.e. palms + Dasypogonaceae) to have arisen between 110-  
229 120 mya (these dates were used as the 95% prior on a normal distribution with a mean of 115  
230 mya). We ran BEAST2 for  $2 \times 10^8$  generations of the MCMC, sampling every  $5 \times 10^4$  generations,  
231 discarding the first 30% of samples as burn-in after a pre-burn-in period of  $10^5$  samples. We  
232 verified stationarity via effective samples sizes  $>200$  for each parameter in TRACER (Rambaut  
233 *et al.*, 2014), and also verified convergence of parameter values by combining results of three  
234 independent runs of BEAST2 from random starting seeds.

235 **Ancestral range reconstruction.** We used the chronogram from BEAST2 to infer  
236 ancestral ranges of *Brahea* species in BioGeoBEARS (Matzke, 2014). We chose six areas,  
237 corresponding to major physiographic regions of Mexico and Central America (e.g. Thayer,  
238 1916; Riddle *et al.*, 2000; Bennett and Oskin, 2014): A) the Baja Californian Peninsula; B)  
239 northwestern mainland Mexico, containing the Sierra Madre Occidental, Sonoran Basin-and-  
240 Range, and Pacific Coastal Plain; C) northeastern Mexico, containing the Sierra Madre  
241 Occidental, the Great Plain, and the Northern Gulf Coast Plain; D) central/southern Mexico,  
242 containing the Mexican Transvolcanic Belt and the Southern Sierra Madre; E) southeastern  
243 Mexico and Central America; and F) Guadalupe Island. We used a time-stratified approach, with  
244 two time intervals (25.7-7.2 mya, and 7.199-0 mya), corresponding to the formation of  
245 Guadalupe Island and the Gulf of California (i.e. the separation of Baja California from mainland  
246 Mexico) approximately 7.2 million years ago (Bennett and Oskin, 2014). We used no constraints  
247 between directly adjacent areas (i.e. dispersal probabilities of 1.0), a dispersal probability of 0.5  
248 for non-adjacent areas, and a probability of 0.1 for dispersal probability between Baja California  
249 and southeastern Mexico/Central America. For the first interval (25.7-7.2 mya), dispersal  
250 probability between Guadalupe Island and all other areas was set to zero, and then to 0.01 for the  
251 second interval (7.199-0 mya). Also in the second interval, we set dispersal probability at 0.1  
252 between Baja California and northwestern mainland Mexico. We used the BayAreaLike+j model  
253 in BioGeoBEARS (Matzke *et al.*, 2014).



254           **Species distribution modeling and ecological niche differentiation.** We inferred species  
255 distribution models (SDM) to: (1) determine if the contemporary ranges of *Brahea* species can  
256 be modeled using available bioclimatic predictor variables; (2) test signal of niche divergence for  
257 selected pairs of *Brahea* species with overlapping ranges; (3) assess the degree to which SDMs  
258 can inform taxonomic boundaries in the group. We obtained occurrence data for all species  
259 included in this study via the Global Biodiversity Information Facility (GBIF.org, accessed 16  
260 January 2018), followed by filtering both manually and using the ‘trim.occ’ R function of Nunes  
261 and Pearson (2017).

262           We produced SDMs using MaxEnt (version 3.4.1; Phillips *et al.*, 2017) through the R  
263 package Dismo (version 1.1-4; Hijmans *et al.*, 2017). Two environmental datasets were used for  
264 SDMs: the entire WorldClim dataset (version 2.0; Fick and Hijmans, 2017), and a Pearson  
265 correlation-filtered version, both at ten-minute resolution [see Supplementary Information,  
266 Methods for additional details]. We tested pairs of species in the *B. armata* clade, and between  
267 “*B. berlandieri*” and *B. dulcis* for niche equivalency (Warren *et al.*, 2008) and phylogenetic  
268 niche conservatism (Harvey and Pagel, 1991; see Pyron *et al.*, 2015). We used the R function  
269 ‘nicheEquivalency’ in the Dismo package to conduct Warren’s Identity test; and the ‘Random  
270 Translocation and Rotation’ (RTR) and the modified niche overlap (MO) metric of Nunes and  
271 Pearson (2017) to test for Phylogenetic Niche Conservatism (RTR and MO are hereafter  
272 collectively referred to as the RTR-MO). We adjusted our alpha level for comparisons made of  
273 species in the *B. armata* clade using Bonferroni correction ( $\alpha_{\text{adjusted}} = 0.016$ ).

274

275

276

277

278

279

## RESULTS

280  
281  
282  
283  
284  
285  
286  
287  
288  
289  
290  
291  
292  
293  
294  
295  
296  
297  
298  
299  
300  
301  
302  
303  
304  
305  
306  
307  
308  
309  
310  
311  
312  
313  
314  
315  
316  
317  
318  
319

**Datasets.** Features of all molecular datasets included in this study are summarized in Table 2. The complete plastome alignment of 11 *Brahea* and two outgroup taxa (*Chamaerops*, *Washingtonia*) is 132,870 bp in length. Removal of all sites with gaps/missing data and ambiguity codes produced an alignment of 121,301 bp with 333 parsimony-informative sites. Four contiguous regions of the mitochondrial genome were included here (approximately 67, 91, 52, and 25 kb, respectively), totaling 261,650 bp when concatenated. After removing gaps and ambiguities as above, the total aligned length was 212,874 bp with 304 Parsimony-informative sites. Amplicons for *CISP5* showed clear evidence of double banding, and so this locus was excluded from further analysis. The total, combined dataset was 342,142 bp in length, with 756 PIC. Data are deposited under GenBank accession numbers ~~XXXXXXXX-XXXXXX~~.

### Phylogenetic analyses

**Plastomes.** Parsimony, Maximum Likelihood, and Bayesian analyses of whole aligned plastomes, with one copy of the IR removed, yield highly resolved and strongly supported relationships [Fig. 1A; Supplementary Information, Fig. S1]. *Brahea* is supported as monophyletic (Parsimony Jackknife = 100, ML Bootstrap = 100, Bayesian Posterior Probability = 1.0; denoted as ‘100, 100, 1.0’ hereafter), within which there are two strongly supported principal clades. The first of these (100, 100, 1.0) contains *B. decumbens*, *B. calcarea*, *B. dulcis*, and *B. berlanderi* (hereafter referred to as the ‘*B. dulcis* clade’). The latter two accessions share a close relationship (89, 94, 1.0), but relationships among *B. decumbens*, *B. calcarea*, and the clade of (*B. berlanderi*, *B. dulcis*) are unresolved. The next clade contains all remaining *Brahea* (100, 98, 1.0), and is further divided into two clades within which all relationships are strongly supported ( $\geq 97$ , 1.0). The dwarf species *Brahea moorei* is sister to *B. sarukhanii* (100, 100, 1.0), while *B. pimo* is sister to *B. salvadorensis* (100, 100, 1.0), and these two clades are sister to one another (100, 100, 1.0; hereafter referred to as the *B. pimo* clade). Sister to this is a clade composed of (*B. armata*, *B. aculeata*; 90, 93, 1.0), successively sister to *B. brandegeei* (98, 97, 1.0), and *B. edulis* (100, 100, 1.0), hereafter referred to as the ‘*B. armata* clade.’

**Mitochondrial DNA.** Relationships overall are less strongly supported for mtDNA than for plastomes (Fig. 1B). The three primary clades recovered from the plastome data are also recovered for mtDNA. A notable difference is the placement of the *B. dulcis* clade as sister to the *B. pimo* clade, collectively sister to the *B. armata* clade, but this relationship is weakly supported (54, 78, 0.99). Many sister relationships are identical to those from the plastome and are well supported (e.g. *aculeata*+*armata*; *moorei*+*sarukhanii*; *pimo*+*salvadorensis*), while remaining sister relationships among species that differ from those of the plastome receive weak support.

**Nuclear DNA.** Relationships based on nuclear ribosomal DNA (rDNA) are highly identical to those based on plastomes, albeit with lower support overall, and differing only in the placement of *B. decumbens* [Supplementary Information, Fig. S1]. Both Malate Synthase (*MS*) and *CISP4* recover the same ‘deep’ tree structure among the three principal clades, but with

320 weak support individually [Supplementary Information, Fig. S1]. *RPB2* displays several  
321 relationships not observed for any other locus, but most have weak support; e.g., *B. moorei* and  
322 *B. brandegeei* group in a clade of *B. dulcis*, *B. berlandieri*, and *B. calcarea* [Supplementary  
323 Information, Fig. S1].

324 **Combined analyses.** Combined nuclear data (rDNA, *MS*, *CISP4*, and *RPB2*) yield a  
325 highly supported topology similar to that based on plastomes, differing only in the placement of  
326 *B. decumbens* (Fig. 1C). Analysis of the concatenated dataset from all three genomes recovers a  
327 highly supported tree (Fig. 1D; all support values >94). These relationships differ from those of  
328 the plastome only in the placement of *B. decumbens* as sister to (*B. calcarea*, (*B. dulcis*, *B.*  
329 *berlandieri*)). Analysis in SVDquartets (specifying one tree for all sites) yields an identical  
330 topology to those based on Parsimony, Maximum Likelihood, and Bayesian Analysis  
331 [Supplementary Information, Fig. S2]. In this SVDquartets analysis, a topology of (*B. edulis*, (*B.*  
332 *brandegeei*, (*B. armata*, *B. aculeata*))) is recovered with 100% Bootstrap support for all  
333 relationships; by contrast, a topology of (*B. brandegeei*, (*B. edulis*, (*B. armata*, *B. aculeata*))) is  
334 recovered under the multispecies coalescent model, with only 39% Bootstrap support for the  
335 placement of *B. edulis* as sister to (*B. armata*, *B. aculeata*). A second coalescent-model analysis  
336 in SVDquartets, specifying the ‘Erik+2’ parameter, places *B. edulis* as sister to *B. brandegeei*  
337 with low support (Bootstrap = 54), and these are sister to (*B. armata*, *B. aculeata*). Thus, there is  
338 little support in coalescent analyses for the relative placement of *B. edulis* and *B. brandegeei*  
339 within the *B. armata* clade.

340 Robinson-Foulds tree distances on average were greatest between the *CISP4* topology  
341 and all other topologies [Supplementary Information, Table S1]. Out of the three largest single-  
342 genome alignments (i.e. combined nrDNA, mtDNA, and plastomes), the combined nuclear tree  
343 had the lowest RF distance to the total combined tree ( $2\times RF = 0$ ), followed by the plastome tree  
344 ( $2\times RF = 2$ ), and the mtDNA tree ( $2\times RF = 6$ ).

345

### 346 **Growth form evolution**

347 Maximum height in *Brahea* ranges from 0.4 m in *B. moorei* to 15 m in *B. armata*. The  
348 tallest species occupy the *B. armata* clade [ancestral value =  $10.63 \pm 2.08$  m (i.e.  $\pm$  one standard  
349 deviation)], while the shortest species occupy the *B. pimo* clade (ancestral value =  $5.32 \pm 2.31$  m)  
350 (Fig. 4). Both of these clades comprise subgenus *Erythea* sensu Quero and Yáñez (2000)  
351 (ancestral value =  $6.95 \pm 2.63$  m). The ancestor of subgenus *Brahea* is estimated to have had a  
352 maximum height of  $6.37 \pm 1.85$  m. Maximum height shows a strong relationship with root-to-tip  
353 branch lengths, which range from 0.000469 substitutions $\cdot$ site $^{-1}$  (s $\cdot$ s $^{-1}$ ) in *B. dulcis* to 0.000803 s $\cdot$ s $^{-1}$   
354  $^{-1}$  in *B. moorei* ( $F = 32.94$ ,  $df = 11$ ,  $p = 0.00013$ ). However, this relationship is non-significant  
355 when correcting for phylogenetic relationships via Independent Contrasts ( $F_{pic} = 0.002$ ,  $df = 10$ ,  
356  $p = 0.96$ ), suggesting that any relationship between these traits is better explained by shared  
357 ancestry. Pagel’s  $\lambda$ , a measure of phylogenetic signal, was significantly different than a model of  
358  $\lambda = 0$  for root-to-tip branch lengths ( $\lambda = 1.06$ ,  $P = 0.0009$ ), but not for maximum height ( $\lambda = 0.61$ ,  
359  $P = 0.15$ ). The two shortest species likely evolved from taller ancestors: maximum height in *B.*

360 *decumbens* is 2.5 m vs. the ancestral value of  $6.37 \pm 1.85$  m for the *B. dulcis* clade, while in *B.*  
361 *moorei* maximum height is 0.4 m vs. the ancestral values of  $5.14 \pm 2.17$  m for (*B. moorei*, *B.*  
362 *sarukhanii*).

### 363 **Biogeographic analyses**

364 **Divergence time estimation.** The estimated stem-node age of *Brahea* is 25.6 million  
365 years ago (mya), with a 95% highest posterior density (HPD) of 14.8-35.5 mya, while the crown  
366 age of *Brahea* is estimated to be 15.6 mya (9.1-22.2) (Fig. 2). Estimates of the crown radiations  
367 of the three principal clades of *Brahea* are: 5.5 mya (2.1-9.8) for the *B. armata* clade; 7.6 mya  
368 (3.3-12.0) for the *B. pimo* clade; and 6.2 mya (2.2-11.1) for the *B. dulcis* clade. *Brahea armata*  
369 and *B. aculeata* likely diverged relatively recently (1.36 mya, 0.05-2.6), as did *B. dulcis* and *B.*  
370 *berlandieri* (0.5, 0.00-1.4).

371 **Ancestral range reconstruction.** We inferred an ancestral range of AB for the *B. armata*  
372 clade (Fig. 3; Baja California + northwestern mainland Mexico), and all nodes within this clade  
373 are estimated to share the same ancestral range, all with high likelihood percentages for the  
374 BayAreaLike+j model ( $L_{\%} > 0.95$ ). However,  $L_{\%}$  is substantially lower when the 'j' parameter is  
375 excluded. *Brahea edulis* shows a high  $L_{\%}$  of having arisen via founder event speciation on  
376 Guadalupe Island when including the 'j' parameter (jump dispersal). Ancestral ranges are more  
377 ambiguous in the *B. pimo* clade (Fig. 3), with estimates of C (northeastern Mexico) or D  
378 (central/southern Mexico) for the ancestral ranges of *B. moorei* and *B. sarukhanii*, and D or E  
379 (southeastern Mexico/Central America) as the ancestral range of *B. pimo* and *B. salvadorensis*.  
380 An ancestral range of BDE or BCDE (northwestern mainland Mexico, central/southern Mexico,  
381 southeastern Mexico/Central America) is inferred for the common ancestor of the *B. dulcis* clade  
382 ( $L_{\%} = 0.60$  including 'j';  $L_{\%} = 0.10$  excluding 'j'). The ancestral range of *Brahea* as a genus is  
383 equivocal based on the current analysis (BDE  $L_{\%} = 0.18$  including the 'j' parameter; ABCD  $L_{\%} =$   
384  $0.04$  excluding 'j').

385 **Species distribution modeling and ecological niche differentiation.** We rejected  
386 equivalency of SDMs for all comparisons between species pairs of interest (Table 3). RTR-MO  
387 tests identified signal of niche divergence between *B. brandegeei* and *B. aculeata* ( $P = 0.00983$ ,  
388 Supplementary Information, Fig. S3], as well as between *B. aculeata* and *B. armata* [ $P =$   
389  $0.00031$ , Supplementary Information, Fig. S3). Niche space overlap between *B. brandegeei* and  
390 *armata* falls below the established 5% CI of the null distribution, but is not significantly different  
391 from the null post-Bonferroni correction ( $P = 0.0374$ ;  $\alpha_{\text{adjusted}}$  critical value = 0.016). The RTR-  
392 MO test also failed to reject that the observed overlap between *B. berlandieri* and *dulcis*  
393 significantly differed from the null distribution ( $P = 0.216$ ).

394 We ultimately excluded approximately half of the GBIF localities, after manually and  
395 ecologically filtering outliers resulting from: taxonomic uncertainty, obvious cultivation out of  
396 the native range, or a lack of georeferencing/coordinate certainty [Supplementary Information,  
397 Table S2]. We identified no major differences between published species ranges and the extents  
398 of our filtered localities or replicated SDMs, with the exceptions of *B. calcarea* and *B.*  
399 *decumbens*, based on visual cross-validation using range maps of Henderson *et al.* (1995).

400 Analyses using our Pearson-filtered predictor dataset conservatively resulted in more  
401 overestimation of SDM extent, relative to those using the entire Worldclim dataset. The SDMs  
402 and associated downstream tests we report were based on the Pearson-filtered dataset  
403 [Supplementary Information, Table S2], in order to minimize false positives (which can be  
404 attributed to uncertainties associated with the use of publicly available data), and model  
405 overfitting.

406 MaxEnt analyses accurately predict the present-day extent of *Brahea* species using  
407 Bioclim variables [Supplementary Information, Table S3]. Models did not appreciably vary  
408 between MaxEnt replicates, and the predictor variables that contributed the most to each SDM  
409 were found to be both suitable and stable, as judged by marginal and SDM-specific response  
410 curves [see Supplementary Information, Link 1]. Area under the curve of the receiver operator  
411 characteristic, and the percent contributions of predictor variables to each SDM is reported in  
412 Supplementary Information, Table S4. The majority of variation observed between SDM extents  
413 was attributable to over-prediction of areas of low occurrence probability ( $< 0.4$ ). Unique  
414 combinations of environmental predictor variables influenced the SDM of each species  
415 [Supplementary Information, Table S4], but some clade-specific predictor variable influences are  
416 evident. Over-prediction of occurrence and coarser resolution of predictor variables here result in  
417 more conservative results (though this may seem counterintuitive), since each measures observed  
418 overlap of estimated niche space. The extent of SDMs for *B. nitida* and *B. decumbens* were  
419 strongly over-predicted relative to published ranges, including many points outside of the  
420 predicted range, and a small area of occurrence, respectively. We thus chose not to include these  
421 two species in tests of niche equivalency or phylogenetic niche conservatism in the *B. dulcis*  
422 clade, considering the perceived low quality of SDMs inferred for *B. nitida* and *B. decumbens*.

423  
424

## DISCUSSION

425  
426  
427  
428  
429  
430  
431  
432  
433  
434  
435  
436  
437  
438  
439  
440  
441  
442  
443  
444  
445  
446  
447  
448  
449  
450  
451  
452  
453  
454  
455  
456  
457  
458  
459  
460  
461  
462  
463

Palm systematics has been a challenge due to a combination of morphological homoplasy and extremely slow plastid DNA substitution rates (Uhl and Dransfield, 1987; Uhl *et al.*, 1995; Gaut *et al.*, 1992; Barrett *et al.*, 2016a). Because of this, palm systematists have turned to genome-scale datasets, as these greatly increase the number of informative characters available for phylogenetic analyses (Barrett *et al.*, 2016a; Comer *et al.*, 2015; 2016; Barrett *et al.*, 2016b; Heyduk *et al.*, 2016). Here we have sequenced over 400 kb of DNA from all three plant genomes, largely resolving and providing support for relationships among currently known species of *Brahea*. Furthermore, this study is the first to estimate divergence times, ancestral ranges, ancestral growth forms, and ecological niche space for this highly variable, taxonomically complex, and ecologically/economically important (e.g. Pulido and Coronel-Ortega, 2015) group of American palms.

### Phylogenetic Analyses

Despite the large amount of data generated per species of *Brahea*, we recovered fewer than 1,000 total informative positions from three genomes for our combined analysis. Yet, this number was sufficient to provide highly supported relationships among species of *Brahea*. Information content varies from an average of 1.2 informative sites/1,000 bp in mtDNA to 33.1 sites/1,000 bp in nuclear *CISP4* (Table 2), underscoring the importance and power of including nuclear DNA in phylogenetic analyses of palms (e.g. Heyduk *et al.*, 2016).

Concatenated analyses yield high support for a single set of relationships, but coalescent based analyses in SVDquartets differ in the placement of *B. edulis*/*B. brandegeei* of the *B. armata* clade, with little to no support [Fig. 1; Supplementary information, Fig. S1 and S2]. Differing relationships based on coalescent methods indicate potential conflict among datasets, suggesting that incomplete lineage sorting, gene flow, or both may influence the recovered relationships in *Brahea*. This finding underscores the need to include many nuclear loci and multiple representatives of each putative species, such that scenarios of ILS and gene flow can be modeled and explicitly differentiated. Ways to accomplish this include examining the distribution of gene trees via concordance factors (e.g. Ané, 2007; Crawl *et al.*, 2017), or using methods that specifically incorporate gene flow (e.g. Jackson *et al.*, 2017; Morales *et al.*, 2017).

The two principal clades recovered here correspond closely to the subgenera *Brahea* and *Erythea* recognized by Moore (1973), Uhl and Dransfield (1987), Quero and Yáñez (2000), and Hodel (2006). *Brahea moorei*, a dwarf species from northeastern Mexico, is strongly supported as being a member of subgenus *Erythea*, in contrast to its placement in subgenus *Brahea* by Quero and Yáñez (2000). The more recently described *Brahea sarukhanii* (Quero, 2000), hitherto unplaced among other species of *Brahea*, shows a highly supported sister relationship to *B. moorei*, despite its caulescent habit and restricted distribution in Jalisco/Nayarit of western central Mexico.

464           Only two other studies to date have included multiple representatives of *Brahea*. Bacon *et*  
465 *al.* (2012) addressed biogeographic questions in the diverse fan palm tribe Trachycarpeae, which  
466 includes *Brahea*. Their analysis included four species of *Brahea*; three accessions of *B. dulcis*  
467 were sister to a clade of (*B. aculeata*, (*B. armata*, *B. brandegeei*)). Though sampling is limited in  
468 that study for *Brahea*, there is some agreement with the current study in that *B. dulcis* is  
469 separated from the *B. armata* clade. In that study, *B. brandegeei* is sister to *B. armata*, as  
470 opposed to *B. aculeata* being sister to *B. armata* in the current study, though this relationship is  
471 only moderately supported in the former. Klimova *et al.* (2017) used population-level sampling  
472 to address biogeographic questions in *Washingtonia robusta*, *W. filifera*, *Brahea armata*, *B.*  
473 *brandegeei*, and *B. edulis* in Baja California and Guadalupe Island; they also included a single  
474 specimen identified by the authors as '*B. elegans*' (synonymized with *B. armata*) from eastern  
475 Sonora. Sequencing over 2 kb of plastid DNA yielded no variation among *B. armata*, *B.*  
476 *brandegeei*, and *B. edulis*, but their sample identified as *B. elegans* differed by five plastid  
477 substitutions, suggesting this sample might be more closely allied with another species of *Brahea*  
478 (Klimova *et al.*, 2017). Nuclear DNA sequencing yielded evidence of haplotype sharing among  
479 *B. armata*, *B. brandegeei*, and *B. elegans*, but a distinct haplotype for *B. edulis* from Guadalupe  
480 Island. Their findings further suggest a complex evolutionary history of *Brahea* in the region,  
481 and highlight the possibility of gene flow within the *B. armata* complex, though this cannot be  
482 distinguished from incomplete lineage sorting based on their data. Future sampling efforts should  
483 include numerous high-variation nuclear markers, complete or nearly complete organellar  
484 genomes, and a comprehensive sampling of multiple individuals from all currently recognized  
485 species of *Brahea* across their respective geographic ranges.

486

### 487 **Growth form evolution**

488           Maximum Likelihood reconstruction of plant height suggests that the ancestor of *Brahea*  
489 was a medium-statured tree ( $6.85 \pm 3.04$  m). Estimated ancestral heights change little moving  
490 from the root ancestor in Fig. 4 to the ancestors of the *B. pimo* and *B. dulcis* clades, but increase  
491 dramatically in the ancestor of the *B. armata* clade, which contains all of the tallest species of  
492 *Brahea*. Interestingly, the two shortest species, *B. moorei* and *B. decumbens*, each likely evolved  
493 from medium-statured, caulescent ancestors, from which they diverged ca. 5.1 and 6.2 mya,  
494 respectively. The latter findings are likely responsible for the non-significance of phylogenetic  
495 signal in maximum plant height based on Pagel's  $\lambda$ . Dwarf or small-statured palm species are  
496 often closely related to medium or tall-statured species (e.g. the dwarf species *Sabal minor* and *S.*  
497 *etonia*; Zona, 1990; Henderson *et al.*, 1995; Heyduk *et al.*, 2016), suggesting evolution in height  
498 differences can be rapid, as is the case between *B. moorei* and *B. sarukhanii*, and *B. decumbens*  
499 and taller members of the *B. dulcis* clade. *Brahea moorei* and *B. decumbens* are often referred to  
500 as dwarf species, yet they differ in some key ways. First, *B. moorei* has a short, solitary,  
501 rhizomatous, subterranean trunk (more rarely, the trunk can be aboveground), giving the plant a  
502 low-growing, shrub-like appearance (Henderson *et al.*, 1995; Hodel, 2006). *Brahea decumbens*,  
503 on the other hand, has a short, clustered, above-ground trunk, and often assumes a creeping habit

504 (hence the species name ‘*decumbens*’), but is sometimes erect. In fact, as Hodel (2006) observed,  
505 there are many intermediate forms between *B. decumbens* and the widespread *B. dulcis*,  
506 suggesting environmental or local variation, and quite possibly gene flow among these species.

507 A recent study across flowering plants demonstrated a large-scale relationship between  
508 plant height and substitution rates, when controlling for other factors such as species richness  
509 and latitude (Lanfear *et al.*, 2013), in which taller plants tend to have slower rates of substitution.  
510 This situation is pronounced in palms, which display some of the lowest substitution rates among  
511 monocots, and are unequivocally the tallest of the monocots (Barrett *et al.*, 2016a). Here,  
512 although these patterns exist at broad taxonomic scales (e.g. across angiosperm orders and  
513 families), it is unknown whether they also exist at finer taxonomic scales. Thus, we used *Brahea*  
514 as a case to address whether this pattern holds at finer taxonomic levels. Though there is an  
515 apparent negative correlation between substitution rate and height, this relationship is better  
516 explained by common ancestry, as indicated by Phylogenetically Independent Contrasts and  
517 significant phylogenetic signal in branch lengths based on Pagel’s  $\lambda$ . The relationship between  
518 substitution rates and height in plants has been explained by the ‘rate of mitosis’ hypothesis  
519 (Lanfear *et al.*, 2013), in which taller plants typically experience a slow-down of mitosis as they  
520 reach maximum height, and thus fewer potential mutations are passed on via reproductive tissues  
521 relative to the situation in shorter species. However, both *B. moorei* and *B. decumbens*, the two  
522 shortest *Brahea* species, are also extremely slow-growing (Hodel, 2006; S. Lahmeyer, personal  
523 observation), which may obscure any potential effect of plant height on heritable substitution  
524 rates in the genus, if such a relationship exists. Alternatively, the relationship may not exist at  
525 such low taxonomic levels, in which tall vs. short forms have recently evolved, and differences  
526 in substitution rates may potentially be determined by a number of factors differing on a taxon-  
527 by-taxon basis, as suggested by Barrett *et al.* (2016a).

528

## 529 **Biogeographic analyses**

530 ***Divergence time estimates and ancestral range reconstruction.*** The stem and crown age  
531 estimates of *Brahea* (approximately 25.7 and 15.6 mya, respectively; Fig. 2) correspond closely  
532 with those in a previous study that included some accessions of *Brahea* (Bacon *et al.*, 2012). Our  
533 estimates suggest that ancestral forms of *Brahea* were present during some of the major  
534 geological events in Mexico, including the formation of the Transvolcanic Belt in Central  
535 Mexico (starting in the mid-Miocene, ca. 15 mya; Ferrari *et al.*, 2012), the Gulf of California (ca.  
536 7.2 mya; Bennett and Oskin, 2014), and Guadalupe Island (also 7.2 mya), all around the same  
537 time (Dolby *et al.*, 2105).

538 The earliest divergence in *Brahea* corresponds approximately with the onset of formation  
539 of the Transvolcanic Belt in Mexico ca. 15 mya, though the estimated ancestral range of the  
540 common ancestor of all *Brahea* is equivocal based on our analysis in BioGeoBears (Fig. 3). Thus  
541 it is unclear if this geological process may have influenced diversification in *Brahea*. The most  
542 likely ancestral range for subgenus *Erythea* is Baja California and northwestern Mexico, but with  
543 low confidence. Even so, it is clear that geography has played a role in diversification in *Brahea*,



544 with the *B. armata* clade concentrated in the northwest, members of the *B. pimo* clade occupying  
545 central, northeastern, and southeastern Mexico/Central America, and the *B. dulcis* clade  
546 occupying all areas but Baja California and Guadalupe Island.

547 The radiation of the *B. armata* clade began an estimated 5.51 mya (HPD = 2.13-9.84),  
548 which overlaps with the formation of Guadalupe Island and the Gulf of California (Bennett and  
549 Oskin, 2014). Jump dispersal (i.e. founder event speciation) can be attributed to the origin of *B.*  
550 *edulis* on Guadalupe Island. Based on Fig. 3, it is likely that the ancestor of *B. edulis* colonized  
551 Guadalupe Island soon after its formation (ca. 7.2 mya), and has since existed in isolation. The  
552 exact position of *B. edulis* varies among analyses here, either as sister to the remaining members  
553 of the *B. armata* clade, or as sister to (*B. armata*, *B. aculeata*) (Figs. 2, 3). Thus, it is unknown  
554 whether dispersal of the ancestral form of the *B. armata* clade occurred before or after the  
555 evolution of *B. brandegeei* in Baja California.

556 The ancestral range for the *B. armata* clade (Baja California and Northwestern Mexico)  
557 suggests the following sequence of biogeographic events were possible based on interpretation of  
558 Fig. 3: (1) sympatric range-copying in the ancestor of *B. brandegeei* and the remaining members  
559 of the *B. armata* clade; (2) founder event speciation as a result of jump dispersal of the ancestor  
560 of *B. edulis* to Guadalupe Island; and (3) subset/sympatric speciation of *B. aculeata*  
561 (northwestern Mexico) and *B. armata* (Baja California and northwestern Mexico). These  
562 findings contrast with those in other studies suggesting that the formation of the Gulf of  
563 California represents a major driver of allopatric speciation via vicariance (e.g. Riddle *et al.*,  
564 2000). Instead, most speciation events in this clade likely occurred after the separation of Baja  
565 California from western mainland Mexico, suggesting roles for sympatric speciation or dispersal,  
566 especially in the case of *B. edulis*.

567 It is more difficult to interpret the estimated biogeographic history of the *B. pimo* clade,  
568 due to the equivocal likelihood percentage of its ancestral range in both models (Fig. 3).  
569 However, all speciation events in this clade potentially overlap with the ongoing formation of the  
570 Transvolcanic Belt in central Mexico, and thus it is unknown whether the later stages of volcanic  
571 uplift would have contributed to, for example, the divergence of *B. moorei* in northeastern  
572 Mexico and *B. sarukhanii* in central/western Mexico. Our results suggest a larger role for  
573 dispersal to neighboring areas than for vicariance and allopatric speciation due the formation of  
574 the Transvolcanic Belt (Fig. 3).

575 DEC-like models, and especially those carrying the 'j' parameter have been criticized  
576 recently, in that they fail to properly model cladogenetic events by preferentially biasing analyses  
577 towards cladogenesis (as opposed to anagenetic processes), and artificially inflating conclusions  
578 of jump dispersal/founder event speciation (Ree and Sanmartín, 2018). Therefore, we interpret  
579 our findings cautiously, and conclude that our proposed ancestral ranges for the species of  
580 *Brahea* are largely equivocal. The biogeographic history of Mexico and Central America is  
581 complex, and our ability to reconstruct the history of *Brahea* is limited in this case. Additional  
582 sampling within species, improved taxonomic delimitations, and more appropriate models  
583 including anagenetic and cladogenetic change in a time-dependent fashion while incorporating

584 phylogenetic uncertainty (e.g. ClaSSE-type models; Fitzjohn, 2012) may help improve estimates  
585 of ancestral ranges in *Brahea*.

586 ***Species distribution models and ecological niche differentiation.*** Here we tested for  
587 signal of ecological diversification among selected species pairs within the *B. armata* and *B.*  
588 *dulcis* clades. These clades contain the youngest nodes in our chronogram, display overlapping  
589 species ranges in some cases, and contain taxonomic boundaries that remain somewhat uncertain  
590 (e.g. in the *B. dulcis* clade). The recent origin of *Brahea aculeata* and *armata* may be the result  
591 of sympatric ecological diversification in novel habitats. The respective SDMs of *Brahea*  
592 *aculeata* and *armata* are unique, even though their geographic ranges overlap. *Brahea*  
593 *brandegeei* and *armata* are distributed in Baja California and northwestern mainland Mexico,  
594 while *B. aculeata* is found only in northwestern mainland Mexico (Henderson *et al.*, 1995;  
595 Hodel, 2006). However, filtered GBIF records did not include *B. brandegeei* localities from  
596 northwestern mainland Mexico, an area listed by Henderson *et al.* (1995) to be part of this  
597 species' range. Our inferences of SDMs and phylogenetic relationships between these three  
598 species suggest that the northern range and possibly the taller height of *B. armata*, and an eastern  
599 range extent and preference for more upland habitats by *B. aculeata*, may be evidence of  
600 relatively recent niche divergence. These results provide an additional line of evidence  
601 supporting our findings of sympatric speciation in the diversification of the *B. armata* clade in  
602 northwestern Mexico.

603 Recent taxonomic treatments place *B. "berlandieri"* as a synonym of the widespread and  
604 variable *B. dulcis* (e.g. Henderson *et al.*, 1995; Hodel, 2006). Our inferred SDMs provide some  
605 evidence for the recognition of northeastern populations of *B. dulcis* corresponding to *B.*  
606 *berlandieri* (currently known as the former) as a distinct entity, raising the possibility that *B.*  
607 *berlandieri* could in fact be a separate species. Despite their estimated recent divergence time,  
608 their respective SDMs are significantly non-equivalent ( $0.18, P = 7.09 \times 10^{-64}$ ). However, the  
609 failure to distinguish this difference from a null distribution argues against niche divergence as  
610 the force underlying any potential difference among these entities. These results coincide well  
611 with an earlier caveat provided by Warren *et al.* (2014), that SDM non-equivalency is not always  
612 indicative of ecological speciation, and that is likely over-prescribed in the literature. Regardless,  
613 the putative distinctness of *B. berlandieri* warrants further investigation genetically,  
614 morphologically, and ecologically.

615 A greater number of high-resolution, georeferenced, taxonomically-vetted specimen  
616 records from across species ranges would allow us to infer higher quality estimates of occupied  
617 niche space. Reducing the assumed georeferencing and taxonomic errors in publically available  
618 locality datasets would allow use of higher resolution predictor variables, for which many more  
619 datasets exist, e.g. Harmonized Soils, which may prove to be important in *Brahea*, given the  
620 preference of some species for calcareous soils. These improved models would allow us to  
621 include more *Brahea* species, such as *B. calcarea* and *decumbens*, and furthermore to extend  
622 these analyses back in time to ancestral nodes.

623

624  
625  
626  
627  
628  
629  
630  
631  
632  
633  
634  
635  
636  
637  
638  
639  
640  
641  
642  
643

## CONCLUSIONS

We have conducted an explicit phylogenetic study of one of the most poorly understood, yet ecologically important groups of American palms, providing strong resolution and support for phylogenetic relationships in the genus, based on nearly 400 kb of sequence data from all three genomes. We further provide a phylogenetic test of subgeneric species assignments, largely corroborating earlier work based on diagnostic morphological characters. The exception is *B. moorei*, which is strongly supported as being a member of subgenus *Erythea*, but was previously placed in subgenus *Brahea* based on morphological characters including a lack of petiolar spines. We demonstrate the evolution of dwarf forms from taller, tree-like ancestors in *B. moorei* and *B. decumbens*. We provide the first comprehensive estimates of the timing of speciation events across the genus, reveal roles for sympatric speciation and dispersal in the biogeographic history of *Brahea*, and provide evidence of ecological niche divergence among closely related species in the *B. armata* and *B. dulcis* species complexes. The findings are relevant in elucidating complex patterns of biogeographic history in Central America and Mexico. Most importantly, we provide a framework for future studies to be conducted including integrative species delimitation within the genus, estimation of gene flow, phylogeographic history, and more fine-scale investigation of environmental/ecological factors driving evolution in this clade.

LITERATURE CITED

- 644  
645  
646 **Ané C, Larget B, Baum DA, Smith SD, Rokas A. 2007.** Bayesian estimation of concordance  
647 among gene trees. *Molecular Biology and Evolution* **24**: 412-426.  
648 **Asmussen CB, Dransfield J, Deickmann V, Barfod AS, Pintaud JC, Baker WJ. 2006.** A new  
649 subfamily classification of the palm family (Arecaceae): evidence from plastid DNA  
650 phylogeny. *Botanical Journal of the Linnean Society* **151**: 15-38.  
651 **Bacon CD, Baker WJ, Simmons MP. 2012.** Miocene dispersal drives island radiations in the  
652 palm tribe Trachycarpeae (Arecaceae). *Systematic Biology* **61**: 426-442.  
653 **Bacon, CD, Roncal J, Andermann T, et al. In review.** Parallel divergence with gene flow in  
654 Amazonia. *Molecular Ecology*.  
655 **Baker WJ, Dransfield J. 2016.** Beyond Genera Palmarum: progress and prospects in palm  
656 systematics. *Botanical Journal of the Linnean Society* **182**: 207-233.  
657 **Baker WJ, Savolainen V, Asmussen-Lange CB, et al. 2009.** Complete generic-level  
658 phylogenetic analyses of palms (Arecaceae) with comparisons of supertree and  
659 supermatrix approaches. *Systematic Biology* **58**: 240-256.  
660 **Balslev H, Bernal R, Fay MF. 2016.** Palms - emblems of tropical forests. *Botanical Journal of*  
661 *the Linnean Society* **182**: 195-200.  
662 **Barrett CF, Baker WJ, Comer JR, et al. 2016a.** Plastid genomes reveal support for deep  
663 phylogenetic relationships and extensive rate variation among palms and other  
664 commelinid monocots. *New Phytologist* **209**: 855-870.  
665 **Barrett CF, Bacon CD, Antonelli A, Cano A, Hofmann T. 2016b.** An introduction to plant  
666 phylogenomics with a focus on palms. *Botanical Journal of the Linnean Society* **182**:  
667 234-255.  
668 **Bennett SEK, Oskin ME. 2014.** Oblique rifting ruptures continents: Example from the Gulf of  
669 California shear zone. *Geology* **42**: 215-218.  
670 **Berry EW. 1914.** The Upper Cretaceous and Eocene floras of South Carolina and Georgia. *US*  
671 *Geological Survey Professional Papers* **84**: 1-200.  
672 **Bouckaert R, Heled J, Kuhnert D, et al. 2014.** BEAST 2: A software platform for Bayesian  
673 evolutionary analysis. *Plos Computational Biology* **10**: e1003537.  
674 **Chifman J, Kubatko L. 2014.** Quartet inference from SNP data under the Coalescent Model.  
675 *Bioinformatics* **30**: 3317-3324.  
676 **Chifman J, Kubatko L. 2015.** Identifiability of the unrooted species tree topology under the  
677 coalescent model with time-reversible substitution processes, site-specific rate variation,  
678 and invariable sites. *Journal of Theoretical Biology* **374**: 35-47.  
679 **Comer JR, Zomlefer WB, Barrett CF, et al. 2015.** Resolving relationships within the palm  
680 subfamily Arecoideae (Arecaceae) using plastid sequences derived from next-generation  
681 sequencing. *American Journal of Botany* **102**: 888-899.  
682 **Comer JR, Zomlefer WB, Barrett CF, Stevenson DW, Heyduk K, Leebens-Mack JH. 2016.**  
683 Nuclear phylogenomics of the palm subfamily Arecoideae (Arecaceae). *Molecular*

- 684 *Phylogenetics and Evolution* **97**: 32-42.
- 685 **Couvreur TLP, Forest F, Baker WJ. 2011.** Origin and global diversification patterns of  
686 tropical rain forests: inferences from a complete genus-level phylogeny of palms. *BMC*  
687 *Biology* **9**: 44.
- 688 **Crowl AA, Myers C, Cellinese N. 2017.** Embracing discordance: Phylogenomic analyses  
689 provide evidence for allopolyploidy leading to cryptic diversity in a Mediterranean  
690 *Campanula* (Campanulaceae) clade. *Evolution* **71**: 913-922.
- 691 **Dierckxsens N, Mardulyn P, Smits G. 2017.** NOVOPlasty: de novo assembly of organelle  
692 genomes from whole genome data. *Nucleic Acids Research* **45**: e18.
- 693 **Dolby GA, Bennett SEK, Lira-Noriega A, Wilder BT, Munguia-Vega A. 2015.** Assessing the  
694 geological and climatic forcing of biodiversity and evolution surrounding the Gulf of  
695 California. *Journal of the Southwest* **57**: 391-455.
- 696 **Drummond AJ, Ho SYW, Phillips MJ, Rambaut A. 2006.** Relaxed phylogenetics and dating  
697 with confidence. *PLoS Biology* **4**: e88.
- 698 **Doyle JJ, Doyle JL. 1987.** A rapid DNA isolation procedure for small quantities of fresh leaf  
699 tissue. *Phytochemical Bulletin* **19**: 11-15.
- 700 **Dransfield J, Uhl NW, Asmussen CB, Baker WJ, Harley MM, Lewis CE. 2008.** Genera  
701 Palmarum: the evolution and classification of palms. Kew, UK: Kew Publishing.
- 702 **Edgar RC. 2004.** MUSCLE: multiple sequence alignment with high accuracy and high  
703 throughput. *Nucleic Acids Research* **32**: 1792-1797.
- 704 **Endlicher S. 1837.** Genera Plantarum **1**: 252.
- 705 **Felsenstein J. 1985.** Phylogenies and the Comparative Method. *American Naturalist* **125**: 1-15.
- 706 **Ferrari L, Orozco-Esquivel T, Manea V, Manea M. 2012.** The dynamic history of the Trans-  
707 Mexican Volcanic Belt and the Mexico subduction zone. *Tectonophysics* **522-523**: 122-  
708 149.
- 709 **Fick SE, Hijmans RJ. 2017.** WorldClim 2: new 1-km spatial resolution climate surfaces for  
710 global land areas. *International Journal of Climatology* **37**: 4302-4315.
- 711 **FitzJohn RG. 2012.** Diversitree: comparative phylogenetic analyses of diversification in R.  
712 *Methods in Ecology and Evolution* **3**: 1084-1092.
- 713 **Garland T, Harvey PH, Ives AR. 1992.** Procedures for the analysis of comparative data using  
714 phylogenetically independent contrasts. *Systematic Biology* **41**: 18-32.
- 715 **Gaut BS, Muse SV, Clark WD, Clegg MT. 1992.** Relative rates of nucleotide substitution at  
716 the *rbcL* locus of monocotyledonous plants. *Journal of Molecular Evolution* **35**: 292-303.
- 717 **Goloboff PA, Farris JS, Nixon KC. 2008.** TNT, a free program for phylogenetic analysis.  
718 *Cladistics* **24**: 774-786.
- 719 **Govaerts R, Dransfield J. 2005.** World checklist of palms. Richmond: Royal Botanic Gardens,  
720 Kew.
- 721 **Govaerts R, Dransfield J, Zona S, Hodel DR, Henderson A. 2018.** World Checklist of  
722 Arecaceae. Facilitated by the Royal Botanic Gardens, Kew. Published on the Internet;  
723 <http://wcsp.science.kew.org/> Retrieved 16 August 2018.

- 724 **Harvey PH, MD Pagel. 1991.** The comparative method in evolutionary biology. Oxford: Oxford  
725 University Press.
- 726 **Henderson A, Galeano G, Bernal R. 1995.** Field guide to the palms of the Americas. Princeton:  
727 Princeton University.
- 728 **Heyduk K, Trapnell DW, Barrett CF, Leebens-Mack J. 2015.** Phylogenomic analyses of  
729 species relationships in the genus *Sabal* (Arecaceae) using targeted sequence capture.  
730 *Biological Journal of the Linnean Society* **117**: 106-120.
- 731 **Hijmans RJ, Phillips S, Leathwick J, Elith J. 2017.** Dismo: Species Distribution Modeling: R  
732 package version 1.1-4. <https://cran.r-project.org/package=dismo>
- 733 **Hodel, D. R. 2006.** Beautiful *Brahea*. *Palm Journal* **184**: 4-15.
- 734 **Hodel, D. R. 2018a.** An overview of *Brahea*. *Palm Journal* **215**: 4-23.
- 735 **Jackson ND, Morales AE, Carstens BC, O'Meara BC. 2017.** PHRAPL: Phylogeographic  
736 inference using approximate likelihoods. *Systematic Biology* **66**: 1045-1053.
- 737 **Johnson D. 1998.** *Brahea edulis*. The IUCN Red List of Threatened Species 1998:  
738 e.T38455A10120521.  
739 <http://dx.doi.org/10.2305/IUCN.UK.1998.RLTS.T38455A10120521.en>.
- 740 **Katoh K, Standley DM. 2013.** MAFFT Multiple sequence alignment software version 7:  
741 Improvements in performance and usability. *Molecular Biology and Evolution* **30**: 772-  
742 780.
- 743 **Klimova A, Hoffman JL, Gutierrez-Rivera JN, de la Luz JL, Ortega-Rubio A. 2017.**  
744 Molecular genetic analysis of two native desert palm genera, *Washingtonia* and *Brahea*,  
745 from the Baja California Peninsula and Guadalupe Island. *Ecology and Evolution* **7**:  
746 4919-4935.
- 747 **Kubatko LS, Degnan JH. 2007.** Inconsistency of phylogenetic estimates from concatenated  
748 data under coalescence. *Systematic Biology* **56**: 17-24.
- 749 **Lanfear R, Ho SYW, Davies TJ, et al. 2013.** Taller plants have lower rates of molecular  
750 evolution. *Nature Communications* **4**: 1879.
- 751 **Martius CFP. 1838.** *Historia Naturalis Palmar* **3**: 243-244.
- 752 **Matzke NJ. 2014.** Model selection in historical biogeography reveals that founder-event  
753 speciation is a crucial process in island clades. *Systematic Biology* **63**: 951-970.
- 754 **Moore HE. 1973.** The major groups of palms and their distribution. *Gentes Herbarum* **11**: 27-  
755 140.
- 756 **Morales AE, Jackson ND, Dewey TA, O'Meara BC, Carstens BC. 2017.** Speciation with  
757 gene flow in North American *Myotis* bats. *Systematic Biology* **66**: 440-452.
- 758 **Nunes LA, Pearson RG. 2017.** A null biogeographical test for assessing ecological niche  
759 evolution. *Journal of Biogeography* **44**: 1331-1343.
- 760 **Pan AD, Jacobs BF, Dransfield J, Baker WJ. 2006.** The fossil history of palms (Arecaceae) in  
761 Africa and new records from the Late Oligocene (28–27 Mya) of north-western Ethiopia.  
762 *Botanical Journal of the Linnean Society* **151**: 69-81.
- 763 **Paradis E, Claude J, Strimmer K. 2004.** APE: Analyses of Phylogenetics and Evolution in R

- 764 language. *Bioinformatics* **20**: 289-290.
- 765 **Phillips SJ, Anderson RP, Dudik M, Schapire RE, Blair ME. 2017.** Opening the black box:  
766 an open-source release of Maxent. *Ecography* **40**: 887-893.
- 767 **Pulido MT, Coronel-Ortega M. 2015.** Ethnoecology of the palm *Brahea dulcis* (Kunth) Mart.  
768 in central Mexico. *Journal of Ethnobiology and Ethnomedicine* **11**: 1-17.
- 769 **Pyron RA, Costa GC, Patten MA, Burbrink FT. 2015.** Phylogenetic niche conservatism and  
770 the evolutionary basis of ecological speciation. *Biological Reviews* **90**: 1248-1262.
- 771 **Quero H. 2000.** *Brahea sarukhanii*, a new species of palm from Mexico. *Palms* **44**: 103-119.
- 772 **Quero H, Yáñez E. 2000.** El complejo *Brahea-Erythea* (Palmae: Coryphideae). Proyecto  
773 CONABIO L216. Informe final. [http://www.conabio.gob.mx/institucion/cgi-](http://www.conabio.gob.mx/institucion/cgi-bin/datos.cgi?Letras=L&Numero=216)  
774 [bin/datos.cgi?Letras=L&Numero=216](http://www.conabio.gob.mx/institucion/cgi-bin/datos.cgi?Letras=L&Numero=216) [accessed 20 October 2010]
- 775 **R Core Team. 2016.** R: A language and environment for statistical computing. R Foundation for  
776 Statistical Computing, Vienna, Austria. URL <https://www.R-project.org/>
- 777 **Rambaut A, Drummond AJ, Xie D, Baele G and Suchard MA. 2018.** Tracer v1.7, Available  
778 from <http://beast.community/tracer>
- 779 **Ramirez-Rodriguez R, Tovar-Sanchez E, Ramirez JJ, Flores KV, Rodriguez V. 2011.**  
780 Introgressive hybridization between *Brahea dulcis* and *Brahea nitida* (Arecaceae) in  
781 Mexico: evidence from morphological and PCR-RAPD patterns. *Botany-Botanique* **89**:  
782 545-557.
- 783 **Revell LJ. 2012.** Phytools: an R package for phylogenetic comparative biology (and other  
784 things). *Methods in Ecology and Evolution* **3**: 217-223.
- 785 **Riddle BR, Hafner DJ, Alexander LF, Jaeger JR. 2000.** Cryptic vicariance in the historical  
786 assembly of a Baja California peninsular desert biota. *Proceedings of the National*  
787 *Academy of Sciences of the United States of America* **97**: 14438-14443.
- 788 **Robinson DF, Foulds LR. 1979.** Comparison of weighted labeled trees. *Lecture Notes in*  
789 *Mathematics* **748**: 119-126.
- 790 **Ronquist F, Teslenko M, van der Mark P, et al. 2012.** MrBayes 3.2: Efficient Bayesian  
791 phylogenetic inference and model choice across a large model space. *Systematic Biology*  
792 **61**: 539-542.
- 793 **Sanderson MJ. 1997.** A nonparametric approach to estimating divergence times in the absence  
794 of rate constancy. *Molecular Biology and Evolution* **14**: 1218-1231.
- 795 **Schrank E. 1994.** Palynology of the Yesomma Formation in Northern Somalia: a study of pollen  
796 spores and associated phytoplankton from the late Cretaceous Palmae Province.  
797 *Palaeontographica Abteilung B* **231**: 63-112.
- 798 **Sedlock RL, Ortega-Gutierrez F, Speed RC, 1993.** Tectonostratigraphic terranes and tectonic  
799 evolution of Mexico. *Geological Society of America Special Papers* **278**: 153 pp.
- 800 **Stamatakis A. 2014.** RAxML version 8: a tool for phylogenetic analysis and post-analysis of  
801 large phylogenies. *Bioinformatics* **30**: 1312-1313.
- 802 **Swofford D. 2002.** PAUP Version 4.0. Phylogenetic Analysis Using Parsimony (and other  
803 methods). Sunderland: Sinauer Associates, Inc.

- 804 **Thayer WN. 1916.** The physiography of Mexico: *Journal of Geology* **25**: 61-94.
- 805 **Uhl NW, Dransfield J. 1987.** Genera Palmarum. Lawrence: Allen Press.
- 806 **Uhl NW, Dransfield J, Davis JI, Luckow MA, Hansen KS, Doyle JJ. 1995.** Phylogenetic  
807 relationships among palms: cladistic analyses of morphological and chloroplast DNA  
808 restriction site variation. In: Rudall PJ, Cribb PJ, Cutler DF, Humphries CJ, eds.  
809 *Monocotyledons: systematics and evolution*. Kew: Royal Botanic Gardens, Kew, 623-  
810 661.
- 811 **Warren DL, Glor RE, Turelli M. 2008.** Environmental niche equivalency versus conservatism:  
812 quantitative approaches to niche evolution. *Evolution* **62**: 2868-2883.
- 813 **Warren DL, Cardillo M, Rosauer DF, Bolnick DI. 2014.** Mistaking geography for biology:  
814 inferring processes from species distributions. *Trends in Ecology & Evolution* **29**: 572-  
815 580.
- 816 **Watson S. 1880.** *Botany of California* **2**: 211.
- 817 **Wehncke EV, López-Medellín X, Wall M, Ezcurra E. 2013.** Revealing an endemic  
818 herbivore-palm interaction in remote desert oases of Baja California. *American Journal*  
819 *of Plant Sciences* **4**: 470-478.
- 820



821

822 **Table 1.** Voucher information and characteristics of high-throughput sequence datasets. HBG =  
 823 Huntington Botanical Garden live collection; HNT = Huntington Botanical Garden Herbarium;  
 824 CSLA = California State University, Los Angeles Herbarium; UCBG = UC, Berkeley Botanical  
 825 Garden live collection; UC = UC, Berkeley & Jepson Herbaria; ‘Plastid,’ ‘rDNA,’ and ‘mt’ =  
 826 mean coverage depth of the plastome, partial rDNA cistron (18S-ITS-26S), and mitochondrial  
 827 genomes, respectively. <sup>a</sup>Recognized as a synonym of *B. dulcis* (Hodel, 2006; Govaerts et al.,  
 828 2018).  
 829

| Species                                                        | Voucher                                | Total # reads | Plastid | rDNA    | mt   | Sequencing |
|----------------------------------------------------------------|----------------------------------------|---------------|---------|---------|------|------------|
| <i>Chamaerops humilis</i> L.                                   | HBG 2073; HNT 10471                    | 8,677,266     | 96.6    | 508.8   | 10.7 | HiSeq2000  |
| <i>Washingtonia robusta</i><br>H.Wendl.                        | CSLA Barrett 310 CSLA                  | 37,162,404    | 1,128.0 | 2,096.3 | 176  | HiSeq2000  |
| <i>Brahea aculeata</i><br>(Brandege) H.E.Moore                 | HBG 16448; HNT 13042                   | 5,529,618     | 175.2   | 2,716.6 | 18   | MiSeq      |
| <i>Brahea armata</i> S.Watson                                  | HBG 23437; HNT 13222                   | 7,273,550     | 301.3   | 3,848.1 | 19.6 | MiSeq      |
| <i>Brahea “berlandieri”</i><br>Bartlett <sup>a</sup>           | HBG 28812; HNT 1745                    | 5,051,496     | 100.6   | 529.6   | 29.8 | MiSeq      |
| <i>Brahea brandegeei</i> (Purpus)<br>H.E.Moore                 | HBG 89871; HNT 13043                   | 9,873,046     | 281.2   | 4,185.6 | 16.5 | HiSeq2000  |
| <i>Brahea decumbens</i> Rzed.                                  | HBG 35650; HNT 13038                   | 4,013,662     | 36.2    | 276.2   | 9.5  | MiSeq      |
| <i>Brahea dulcis</i> (Kunth) Mart.                             | HBG 23220; HNT 13044                   | 15,361,806    | 638.2   | 1,772.7 | 66.1 | NextSeq500 |
| <i>Brahea edulis</i> H.Wendl. ex<br>S.Watson                   | UCBG 2003.0149;<br>1869963, UC 1971077 | 18,933,406    | 554.7   | 3,626.7 | 42.1 | HiSeq2500  |
| <i>Brahea moorei</i> L.H.Bailey<br>ex H.E.Moore                | UCBG 88.0345; UC<br>197077             | 3,103,380     | 59.3    | 1,160.6 | 9.3  | MiSeq      |
| <i>Brahea calcarea</i> Liebm.<br>(syn. <i>B. nitida</i> André) | HBG 27970; HNT 10472                   | 12,865,552    | 494.2   | 871.2   | 30.1 | NextSeq500 |
| <i>Brahea pimo</i> Becc.                                       | HBG 52194; HNT 13045                   | 6,518,544     | 42.8    | 615.3   | 11.4 | MiSeq      |
| <i>Brahea salvadorensis</i><br>H.Wendl. ex Becc.               | HBG 35754; HNT 1029                    | 4,917,552     | 142.8   | 439.2   | 20.8 | MiSeq      |
| <i>Brahea sarukhanii</i><br>H.J.Quero                          | HBG 25151; HNT 10470                   | 15,333,496    | 279.8   | 1,617.1 | 29   | NextSeq500 |

830

831 **Table 2.** Characteristics of the nuclear, mitochondrial, and plastid datasets for *Brahea*. ‘Total L’  
 832 = total length of each alignment; ‘post-filter L’ = length of each alignment after filtering; ‘# P-inf  
 833 sites’ = the number of parsimony informative sites; ‘P-inf/1000bp’ = the number of parsimony  
 834 informative sites per 1,000 bp of alignment; ‘#MPT, L’ = the number of most parsimonious trees  
 835 and their length in steps (i.e. number of nucleotide changes); ‘model’ = the best fit model for  
 836 each alignment based on the corrected Akaike Information Criterion.’

| Locus              | total L | post-filter L | # P-inf sites | P-inf/1000bp | #MPT; L  | 837<br>model |
|--------------------|---------|---------------|---------------|--------------|----------|--------------|
| <i>MS</i>          | 601     | n/a           | 18            | 30.0         | 9, 41    | T92+G        |
| <i>CISP4</i>       | 664     | n/a           | 22            | 33.1         | 3, 60    | GTR+G        |
| <i>RPB2</i>        | 701     | n/a           | 19            | 27.1         | 1, 47    | HKY+G        |
| <b>rDNA</b>        | 6,180   | n/a           | 60            | 9.7          | 3, 218   | TN93+G       |
| <b>Total nrDNA</b> | 8,146   | 7,967         | 119           | 14.6         | 1, 384   | TN93+G       |
| <b>mtDNA</b>       | 261,650 | 212,874       | 304           | 1.2          | 1, 1,164 | GTR+G+I      |
| <b>Plastome</b>    | 132,870 | 121,301       | 333           | 2.5          | 1, 938   | HKY+G+I      |
| <b>Combined</b>    | 402,666 | 342,142       | 756           | 2.2          | 1, 2,490 | GTR+G+I      |

838 **Table 3.** Results of Warren’s Identity Test (*I*) run for 1,000 replicates using both the WorldClim  
839 and Pearson-Filtered data sets ( $\alpha \leq 0.0166$  for the *B. armata* clade, post-Bonferroni correction).

| Species Comparison                       | <i>I</i> statistic | P-Value                |
|------------------------------------------|--------------------|------------------------|
| <i>B. armata</i> vs. <i>aculeata</i>     | 0.249853356        | $1.44 \times 10^{-45}$ |
| <i>B. armata</i> vs. <i>brandegeei</i>   | 0.264126907        | $5.00 \times 10^{-23}$ |
| <i>B. aculeata</i> vs. <i>brandegeei</i> | 0.126009409        | $6.02 \times 10^{-15}$ |
| <i>B. dulcis</i> vs. “berlandieri”       | 0.179367929        | $7.09 \times 10^{-64}$ |

840

841

842

## SUPPLEMENTARY INFORMATION

843 Supplementary Link 1 contains MaxEnt outputs of replicated SDMs for *Brahea aculeata*, *B.*  
844 *armata*, *B. berlandieri*, *B. brandegeei*, and *B. dulcis*. Each folder contains an HTML document  
845 named ‘maxent.html,’ which details all results generated by MaxEnt for each species. Link:  
846 <https://drive.google.com/file/d/1o0Gp-9y7rk2Ou3xVQ7IUelGBafhZxjb/view?usp=sharing>.

847

848

849

## ACKNOWLEDGEMENTS

850

851 We thank the staff at the Huntington Library, Art Collections and Botanical Gardens and  
852 the University of California Botanical Garden (Holly Forbes) for assistance in collecting material  
853 and voucher information. We thank the staff at Global Biologics, LLC. (Sean Blake), Laragen,  
854 Inc. (Jinliang Li, Lindy Him), the WVU Genomics Core Facility (Sandy Simon, Ryan  
855 Percifield), and the WVU-Marshall Shared Sequencing Facility (Don Primerano, Jun Fan) for  
856 sequencing assistance. Financial support was provided by the California State University  
857 Program for Education & Research in Biotechnology, and the WVU Program to Stimulate  
858 Competitive Research. We thank two anonymous reviewers for their comments improving the  
859 manuscript.

860

861  
862  
863  
864  
865  
866  
867  
868  
869  
870  
871  
872  
873  
874  
875  
876  
877  
878  
879  
880  
881  
882  
883  
884  
885  
886  
887  
888  
889  
890  
891  
892  
893  
894  
895

## FIGURE LEGENDS

**Fig. 1.** Maximum Likelihood trees based on plastid (A), mitochondrial (B), nuclear (C), and combined (D) data. Numbers adjacent to branches are Parsimony Jackknife, Maximum Likelihood Bootstrap, and Bayesian posterior probabilities. ‘\*’ = 100% support (or posterior probability = 1 for Bayesian Analysis). ‘--’ = differing topology from ML tree for Parsimony or Bayesian Analysis. Scale bar = substitutions/site.

**Fig. 2.** Divergence time estimates for *Brahea* based on four fossil calibrations. Scale bar = millions of years before present. Gray bars on nodes = 95% highest posterior density of divergence time estimates; numbers at nodes are mean divergence time estimates. “\*” indicates that *B. moorei* is placed in subgenus *Erythea* based on our phylogenetic results, and not in subgenus *Brahea* as in previous treatments.

**Fig. 3.** Biogeographic reconstruction of ancestral ranges for *Brahea* under BayAreaLike and BayAreaLike+j models in BioGeoBEARS. **A.** Chronogram with most likely ancestral ranges. Numbers adjacent to pie charts indicate the likelihood of the most likely ancestral range (top BayAreaLike, bottom, BayAreaLike+j). Dotted line indicates the approximate dates of origin of Guadalupe Island and the formation of the Gulf of California (7.2 mya). **B.** *Brahea armata* (Santa Barbara, California, USA). **C.** *Brahea dulcis* (Fairchild Tropical Botanical Gardens, Coral Gables, Florida, USA). **D.** *Brahea sarukhanii* (Montgomery Botanical Center, Coral Gables, Florida, USA). Photos: C. Barrett. **E.** Map of Mexico and Central America displaying the six different areas chosen to represent of the range of *Brahea*: A. Baja California; B. Northwestern Mainland Mexico; C. Northeastern Mexico; D. Central/Southern Mexico; E. Southeastern Mexico/Central America; F. Guadalupe Island. Geological events (circles): “I.” Formation of the Mexican Transvolcanic Belt (15 mya onward); “II.” Opening of the Gulf of California (7.2 mya onward); “III.” Formation of Guadalupe Island (7.2 mya).

**Fig. 4.** ML ancestral state reconstruction of maximum height among species of *Brahea*, based on a Brownian Motion model in the R packages ‘APE’ and ‘PhyTools.’ Numbers at tips are maximum height values (in meters), and at nodes these are ancestral estimates of maximum height, with one standard error in parentheses. “\*” indicates the two dwarf forms.

### A. Complete Plastome

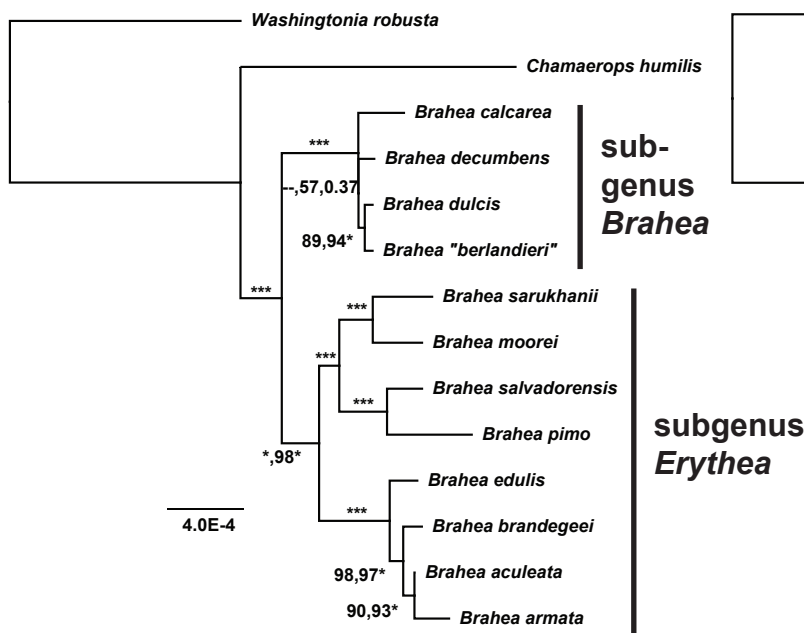

### B. Mitochondrial DNA

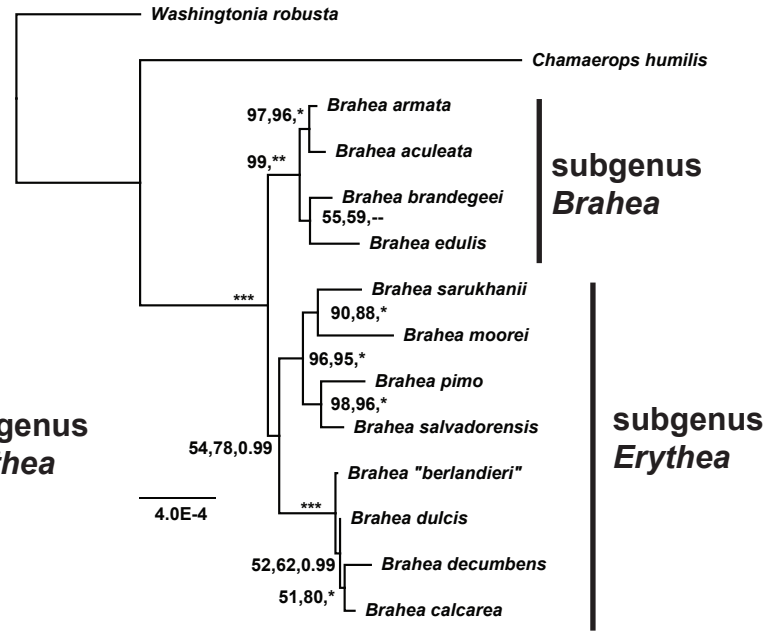

### C. Combined Nuclear DNA

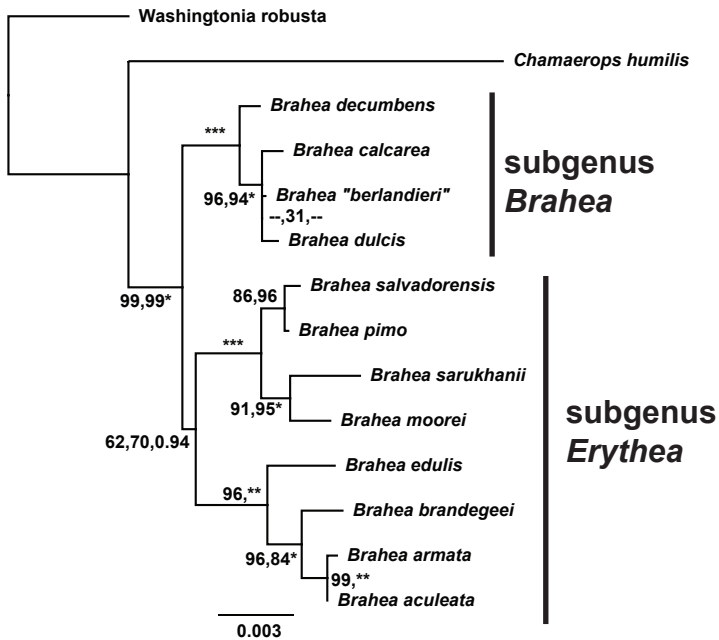

### D. All Data Combined

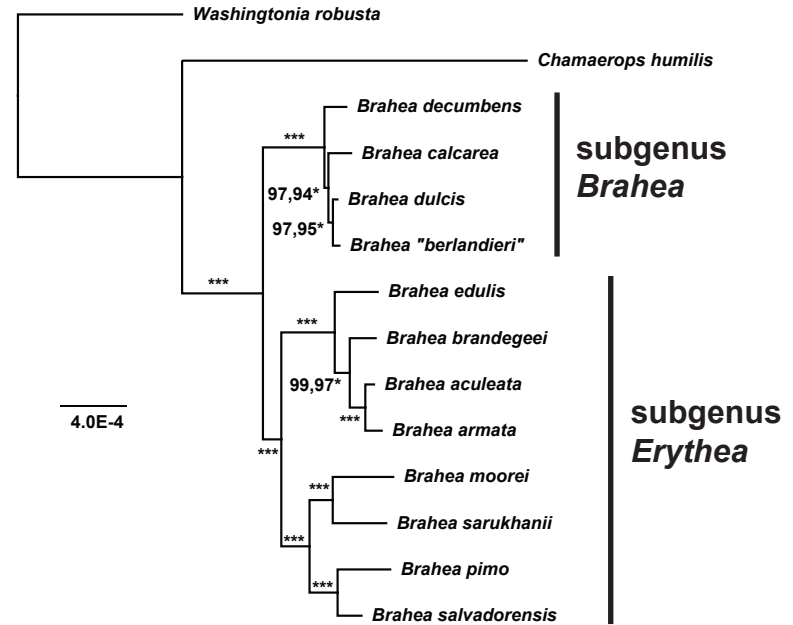

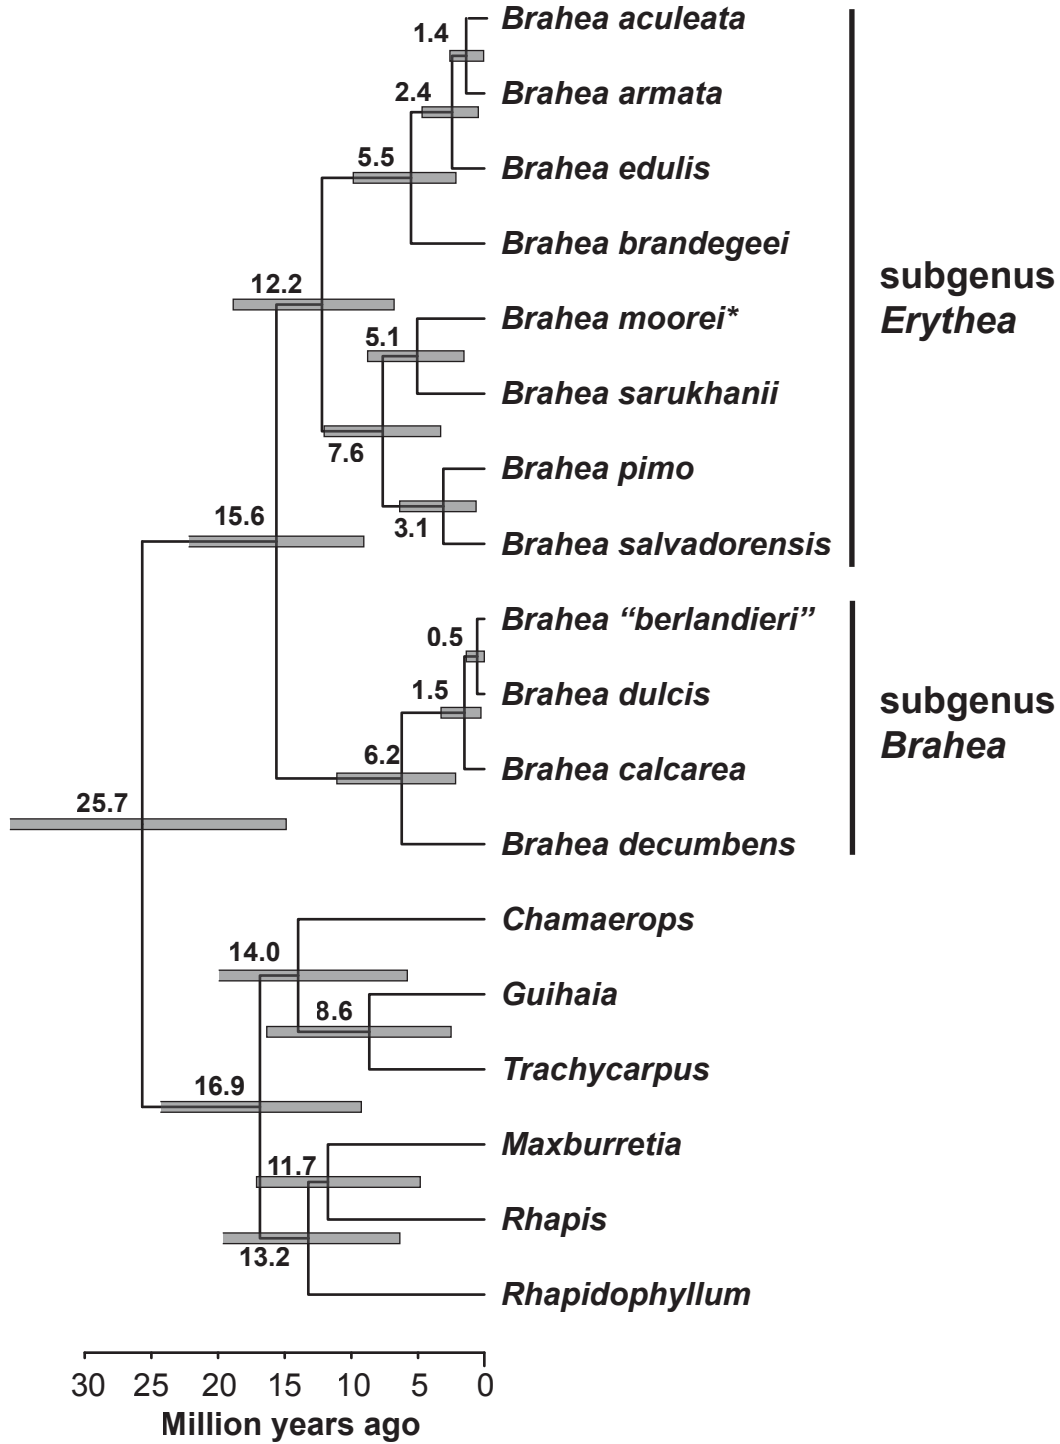

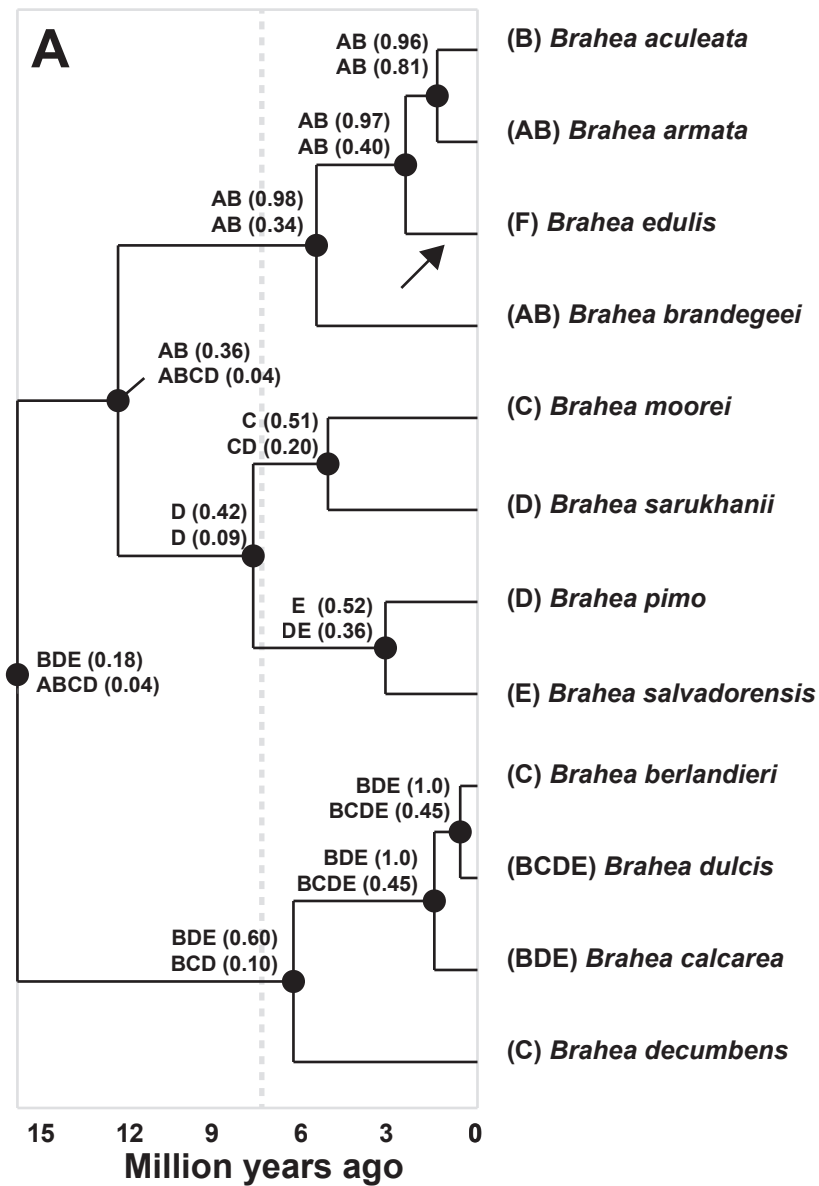

subgenus  
***Erythea***

subgenus  
***Brahea***

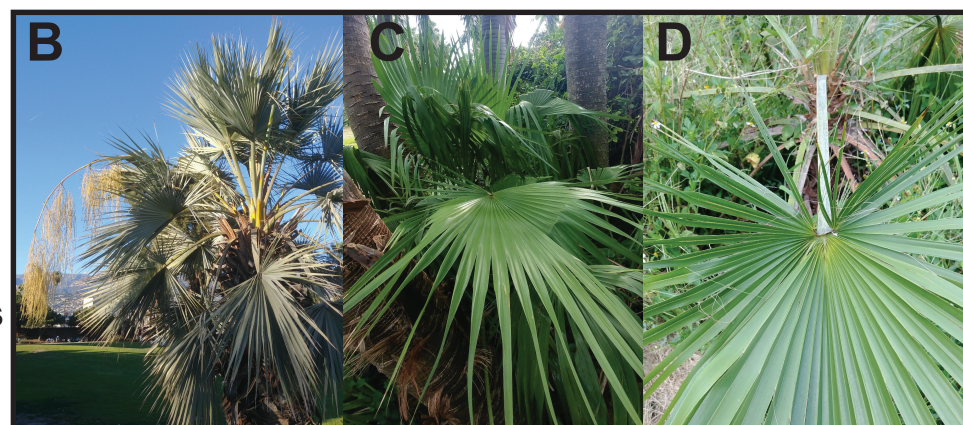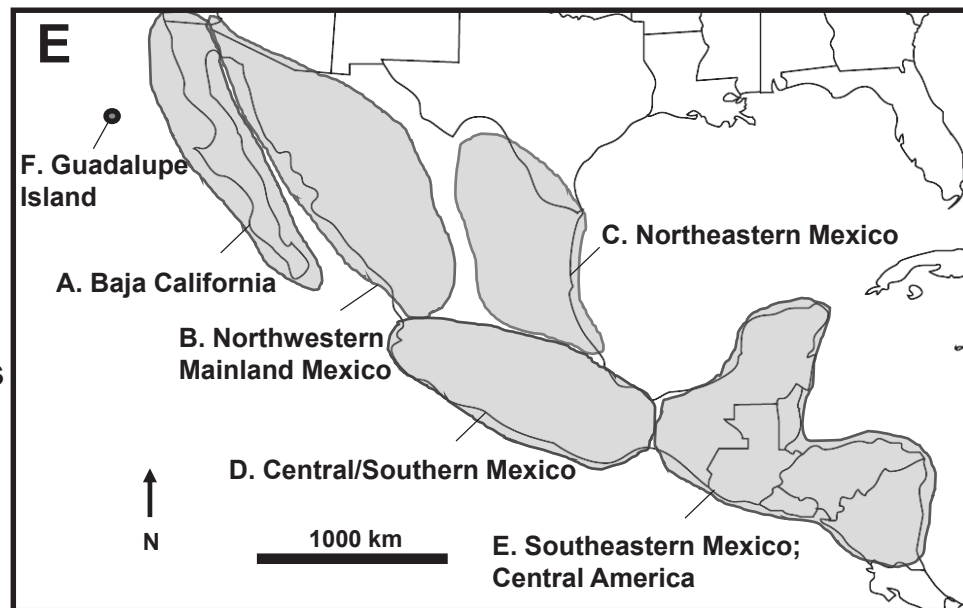



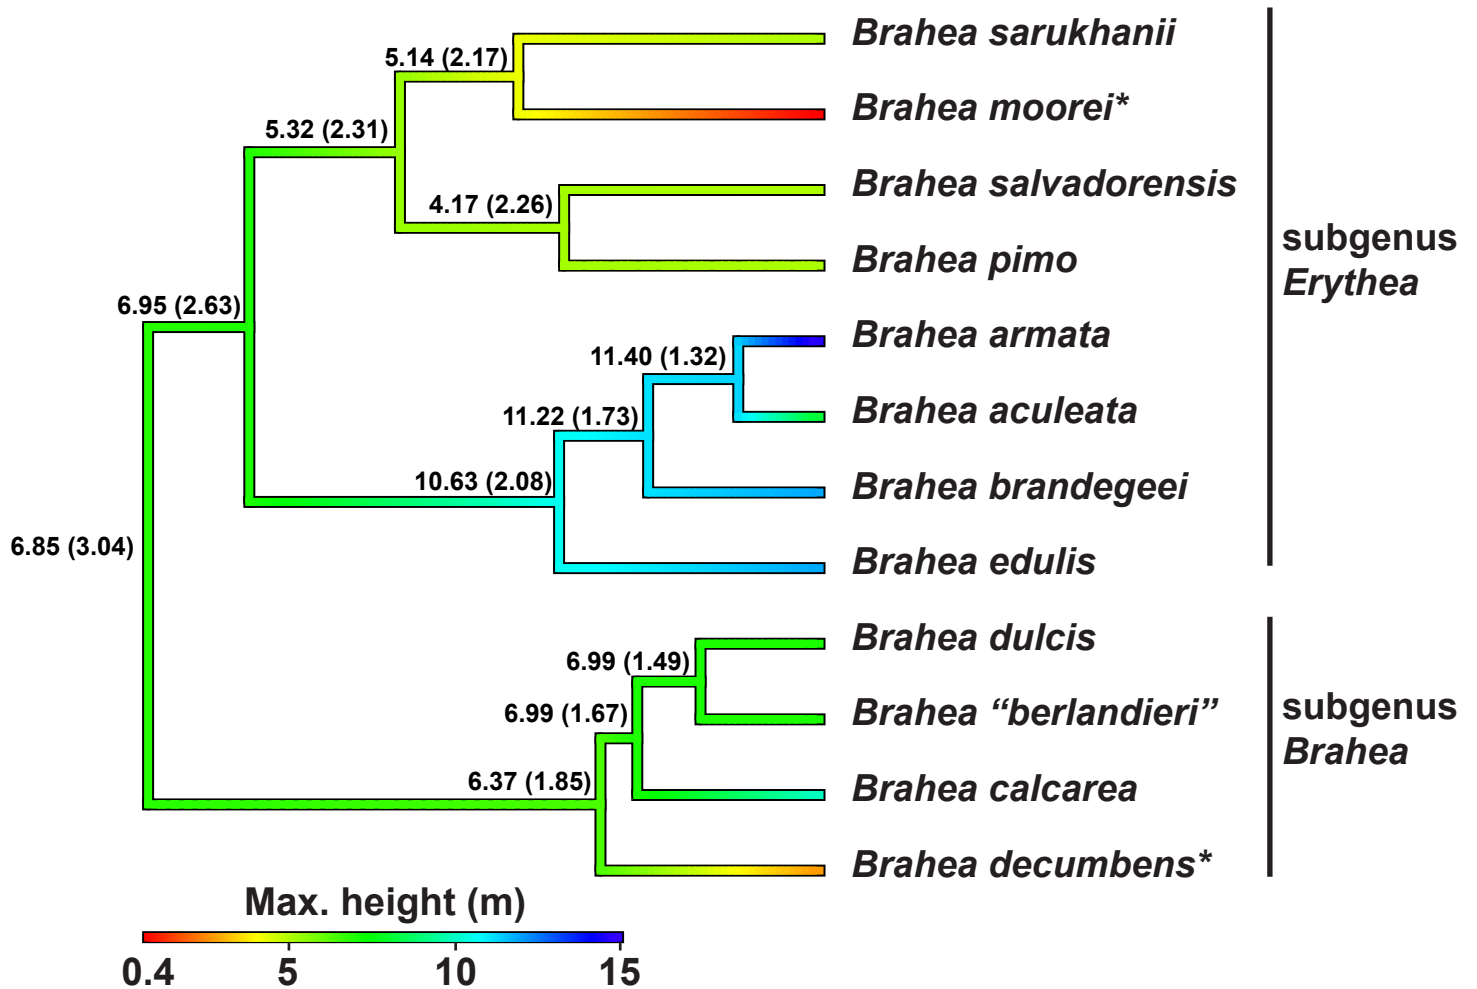

Source: https://www.biorxiv.org/content/10.1101/467779v1.full.pdf
